# Supplementary material for: Transcriptomic Analysis of <em>Streptococcus suis</em> in Response to Ferrous Iron and Cobalt Toxicity
Source: Preprints.org preprint supplement (doi:10.20944/preprints202008.0708.v1), 2020-08-31
Supplement: Supplementary file 1 [file supplementary]

## Sheet: FevsNor.DEG
Table S2. Summary of the differentially expressed genes in the presence of ferrous iron.
Gene_id	readcount_Fe	readcount_Nor	log2FoldChange	pval	padj	description
SSUSC84_RS01570	30502.5	167.514	7.5085	0	0	heavy metal translocating P-type ATPase
SSUSC84_RS06430	2382.57	54.6615	5.4458	1.1344e-63	3.405e-62	glutamine ABC transporter substrate-binding protein
SSUSC84_RS06425	1794.67	45.6531	5.2969	4.8987e-34	6.397e-33	amino acid ABC transporter ATP-binding protein
SSUSC84_RS06435	2010.29	58.8963	5.0931	2.522e-66	7.9246e-65	amino acid ABC transporter permease
SSUSC84_RS05690	191.628	6.03567	4.9887	1.6138e-19	1.1387e-18	aconitate hydratase AcnA
SSUSC84_RS06440	1858.89	72.0945	4.6884	9.4219e-123	1.8947e-120	amino acid ABC transporter permease
SSUSC84_RS09305	14010.6	571.917	4.6146	2.475e-74	1.059e-72	serine protease
SSUSC84_RS07330	587.59	30.1735	4.2835	7.8692e-14	3.9268e-13	alpha-galactosidase
SSUSC84_RS05685	88.8884	5.57562	3.9948	5.4971e-26	5.071e-25	citrate synthase
SSUSC84_RS07400	9751.28	615.261	3.9863	1.0151e-52	2.3198e-51	ATP-dependent helicase
SSUSC84_RS03900	2620.64	204.549	3.6794	6.785e-06	1.8001e-05	GMP reductase
SSUSC84_RS00920	3333.39	269.182	3.6303	2.5971e-49	5.2756e-48	MerR family transcriptional regulator
SSUSC84_RS03825	3796.97	314.225	3.595	5.1258e-33	6.2853e-32	ABC transporter ATP-binding protein
SSUSC84_RS05935	654.572	54.4941	3.5864	2.4816e-70	8.9117e-69	lipoprotein
SSUSC84_RS00445	5509.08	464.084	3.5694	5.0226e-131	1.6834e-128	50S ribosomal protein L23
SSUSC84_RS09945	34.9563	2.96603	3.5589	3.3353e-10	1.3049e-09	hypothetical protein
SSUSC84_RS00550	5399.6	458.28	3.5586	3.7046e-131	1.49e-128	adenylate kinase
SSUSC84_RS03820	2154.54	184.604	3.5449	1.7204e-70	6.407e-69	ABC transporter ATP-binding protein
SSUSC84_RS09925	579.267	51.2465	3.4987	3.935e-68	1.2972e-66	anaerobic ribonucleoside-triphosphate reductase activating protein
SSUSC84_RS09940	2106.83	186.693	3.4963	3.0521e-80	1.8599e-78	metallophosphatase
SSUSC84_RS03745	96.4766	8.6365	3.4817	7.4593e-24	6.3562e-23	GNAT family N-acetyltransferase
SSUSC84_RS05680	150.06	13.4417	3.4808	6.6763e-16	3.7503e-15	NADP-dependent isocitrate dehydrogenase
SSUSC84_RS09935	297.821	26.8456	3.4717	1.9639e-53	4.6464e-52	GNAT family acetyltransferase
SSUSC84_RS07605	3626.68	328.755	3.4636	1.4886e-19	1.0578e-18	queuosine transporter QueT
SSUSC84_RS00455	16909	1543.27	3.4537	3.9299e-133	2.6343e-130	30S ribosomal protein S19
SSUSC84_RS09030	6.75327	0.616413	3.4536	0.0090982	0.015827	hypothetical protein
SSUSC84_RS00460	6651.95	608.223	3.4511	2.5325e-127	6.366e-125	50S ribosomal protein L22
SSUSC84_RS00450	39274.3	3703.08	3.4068	1.977e-132	9.9395e-130	50S ribosomal protein L2
SSUSC84_RS04910	15138.5	1435.61	3.3985	3.4903e-129	1.0027e-126	amino acid ABC transporter permease
SSUSC84_RS00440	15349.3	1498.1	3.357	5.0467e-104	5.3415e-102	50S ribosomal protein L4
SSUSC84_RS00925	15187.4	1497.9	3.3419	2.512e-83	1.6839e-81	type I glutamate--ammonia ligase
SSUSC84_RS00435	15705.6	1560.88	3.3308	7.8722e-34	1.0083e-32	50S ribosomal protein L3
SSUSC84_RS00480	6588.5	693.551	3.2479	2.2108e-115	3.42e-113	30S ribosomal protein S17
SSUSC84_RS00430	5800.33	613.111	3.2419	3.1935e-10	1.2519e-09	30S ribosomal protein S10
SSUSC84_RS00465	21770.9	2305.41	3.2393	1.4122e-120	2.5817e-118	30S ribosomal protein S3
SSUSC84_RS10105	157.582	17.3278	3.1849	1.093e-23	9.2357e-23	thiol reductase thioredoxin
SSUSC84_RS00470	12907.3	1437.93	3.1661	1.3092e-114	1.8806e-112	50S ribosomal protein L16
SSUSC84_RS05930	818.525	92.2048	3.1501	1.8009e-74	7.873e-73	lipoprotein
SSUSC84_RS00490	13723.8	1550.69	3.1457	1.5053e-113	2.0181e-111	50S ribosomal protein L24
SSUSC84_RS05920	779.549	88.5049	3.1388	8.2417e-74	3.3148e-72	ABC transporter ATP-binding protein
SSUSC84_RS08605	6771.91	772.25	3.1324	1.5925e-26	1.5397e-25	30S ribosomal protein S6
SSUSC84_RS06470	10017.9	1146.11	3.1278	1.1461e-47	2.2819e-46	surface-anchored protein
SSUSC84_RS00885	20699.8	2398.84	3.1092	4.3319e-37	6.4529e-36	30S ribosomal protein S12
SSUSC84_RS00505	6572.89	762.147	3.1084	1.5261e-107	1.8052e-105	hypothetical protein
SSUSC84_RS00475	997.576	117.636	3.0841	1.4635e-75	6.8442e-74	50S ribosomal protein L29
SSUSC84_RS08600	12860.1	1531.71	3.0697	1.1348e-37	1.742e-36	single-stranded DNA-binding protein
SSUSC84_RS00485	21540.1	2573.48	3.0652	8.5367e-110	1.073e-107	50S ribosomal protein L14
SSUSC84_RS06000	13819	1657.28	3.0598	5.0741e-51	1.0855e-49	translation initiation factor IF-3
SSUSC84_RS01665	40.5853	4.90002	3.0501	4.2078e-06	1.1451e-05	adhesion protein
SSUSC84_RS05925	705.796	86.9647	3.0207	8.8861e-67	2.8365e-65	ABC transporter permease
SSUSC84_RS04915	7296.98	917.057	2.9922	1.7359e-101	1.6623e-99	amino acid ABC transporter ATP-binding protein
SSUSC84_RS00190	221.785	27.8818	2.9918	1.1316e-29	1.2301e-28	rod shape-determining protein MreD
SSUSC84_RS00185	671.727	84.6316	2.9886	8.3058e-65	2.5307e-63	rod shape-determining protein MreC
SSUSC84_RS10590	71.7928	9.1604	2.9704	2.7104e-16	1.5485e-15	IS630 family transposase
SSUSC84_RS09290	28027.1	3608.46	2.9574	1.2718e-103	1.2788e-101	30S ribosomal protein S2
SSUSC84_RS05995	1525.42	199.628	2.9338	3.7558e-80	2.2215e-78	50S ribosomal protein L35
SSUSC84_RS05990	6339.82	848.146	2.9021	9.9427e-92	7.9979e-90	50S ribosomal protein L20
SSUSC84_RS00890	25183	3422.91	2.8792	4.9722e-79	2.6313e-77	30S ribosomal protein S7
SSUSC84_RS07430	5277.68	723.854	2.8661	3.1024e-46	5.999e-45	phosphomethylpyrimidine kinase
SSUSC84_RS09140	315.45	43.3391	2.8637	2.5094e-42	4.3132e-41	2-isopropylmalate synthase
SSUSC84_RS10115	1925.26	265.004	2.861	1.964e-43	3.4952e-42	hypothetical protein
SSUSC84_RS00495	22413.3	3147.41	2.8321	2.5975e-96	2.3744e-94	50S ribosomal protein L5
SSUSC84_RS00515	15447.7	2174.45	2.8287	1.7823e-95	1.5584e-93	hypothetical protein
SSUSC84_RS08595	3601.52	514.544	2.8072	2.6964e-24	2.3782e-23	30S ribosomal protein S18
SSUSC84_RS10110	16687	2392.39	2.8022	7.1151e-53	1.6447e-51	30S ribosomal protein S4
SSUSC84_RS06615	13.903	2.0056	2.7933	0.00035697	0.00077859	N-acetylmannosamine-6-phosphate 2-epimerase
SSUSC84_RS00520	30464.1	4451.42	2.7748	1.6777e-93	1.4058e-91	50S ribosomal protein L6
SSUSC84_RS05665	2224.45	326.853	2.7667	1.36e-78	7.0126e-77	DUF1846 domain-containing protein
SSUSC84_RS06630	5835.32	862.201	2.7587	1.4364e-39	2.3108e-38	ABC transporter ATP-binding protein
SSUSC84_RS06290	8234.1	1223.23	2.7509	1.3838e-19	9.8679e-19	50S ribosomal protein L11
SSUSC84_RS07325	269.452	40.3209	2.7404	3.4388e-37	5.1608e-36	sugar ABC transporter substrate-binding protein
SSUSC84_RS00425	107.318	16.1844	2.7292	3.1334e-19	2.1654e-18	hypothetical protein
SSUSC84_RS00500	4880.76	742.367	2.7169	1.4217e-83	9.8586e-82	type Z 30S ribosomal protein S14
SSUSC84_RS00535	8433.79	1296.86	2.7012	3.3055e-86	2.462e-84	50S ribosomal protein L30
SSUSC84_RS03810	3868.05	598.368	2.6925	1.8806e-23	1.5824e-22	30S ribosomal protein S16
SSUSC84_RS09125	150.389	23.4444	2.6814	2.8661e-11	1.1958e-10	3-isopropylmalate dehydratase small subunit
SSUSC84_RS07425	5905.45	937.386	2.6553	4.8472e-79	2.6313e-77	membrane protein
SSUSC84_RS00510	18150.7	2928.86	2.6316	1.3949e-84	1.0018e-82	30S ribosomal protein S8
SSUSC84_RS00525	15058.5	2441.56	2.6247	6.0352e-83	3.7928e-81	50S ribosomal protein L18
SSUSC84_RS03705	809.496	133.407	2.6012	3.0592e-56	7.7687e-55	threonine aldolase
SSUSC84_RS05500	79.1176	13.3112	2.5714	2.2263e-05	5.5684e-05	2-dehydro-3-deoxy-phosphogluconate aldolase
SSUSC84_RS00875	2137.02	365.174	2.5489	7.0143e-69	2.3908e-67	co-chaperone GroES
SSUSC84_RS04730	21979.6	3777.06	2.5408	1.6733e-79	9.3475e-78	50S ribosomal protein L10
SSUSC84_RS06635	4784.37	822.285	2.5406	3.073e-59	8.1314e-58	ABC transporter ATP-binding protein
SSUSC84_RS05440	15.8104	2.7192	2.5396	0.00033799	0.00073799	VTC domain-containing protein
SSUSC84_RS09120	382.054	65.9539	2.5342	3.3793e-35	4.6547e-34	translation factor Sua5
SSUSC84_RS00575	39525.7	6830.72	2.5327	1.1791e-79	6.775e-78	DNA-directed RNA polymerase subunit alpha
SSUSC84_RS00565	9742.68	1710.97	2.5095	4.6613e-76	2.2319e-74	30S ribosomal protein S13
SSUSC84_RS09700	21657.4	3811.14	2.5066	1.2345e-77	6.2066e-76	amino acid ABC transporter ATP-binding protein
SSUSC84_RS06285	13388	2385.61	2.4885	5.0137e-21	3.7762e-20	50S ribosomal protein L1
SSUSC84_RS00540	15689	2798.15	2.4872	3.6868e-76	1.8084e-74	50S ribosomal protein L15
SSUSC84_RS00555	13242.6	2374.25	2.4796	2.0636e-75	9.4318e-74	translation initiation factor IF-1
SSUSC84_RS09130	483.483	87.3343	2.4688	2.8461e-43	5.0207e-42	3-isopropylmalate dehydratase large subunit
SSUSC84_RS09875	766.921	140.102	2.4526	1.0258e-50	2.1489e-49	carboxypeptidase regulatory-like domain-containing protein
SSUSC84_RS00580	14393.8	2631.59	2.4514	6.9102e-74	2.836e-72	hypothetical protein
SSUSC84_RS00530	9749.64	1789.19	2.446	3.0905e-56	7.7687e-55	30S ribosomal protein S5
SSUSC84_RS09400	3783.36	701.044	2.4321	4.8183e-68	1.5628e-66	sulfatase
SSUSC84_RS05580	853.377	158.471	2.429	8.5146e-46	1.6154e-44	F0F1 ATP synthase subunit C
SSUSC84_RS00545	58359.4	10926.3	2.4172	5.7603e-74	2.4133e-72	preprotein translocase subunit SecY
SSUSC84_RS09590	1061.47	199.348	2.4127	1.0161e-53	2.4423e-52	rhomboid family intramembrane serine protease
SSUSC84_RS08325	2140.26	402.233	2.4117	3.9498e-62	1.1032e-60	methionine ABC transporter ATP-binding protein
SSUSC84_RS00570	7760.99	1458.98	2.4113	3.1558e-70	1.1134e-68	30S ribosomal protein S11
SSUSC84_RS01420	3276.45	640.744	2.3543	2.0466e-23	1.7149e-22	50S ribosomal protein L32
SSUSC84_RS10430	99.2057	19.8994	2.3177	4.8608e-10	1.8726e-09	teichoic acid D-Ala incorporation-associated protein DltX
SSUSC84_RS01670	248.071	49.9902	2.311	5.6187e-28	5.885e-27	histidine triad protein
SSUSC84_RS03090	492.334	100.05	2.2989	1.4462e-06	4.1254e-06	hypothetical protein
SSUSC84_RS01415	523.365	107.051	2.2895	2.5917e-26	2.4701e-25	50S ribosomal protein L33
SSUSC84_RS04725	17542.3	3595.1	2.2867	6.6637e-66	2.0616e-64	50S ribosomal protein L7/L12
SSUSC84_RS03920	392.137	82.1858	2.2544	1.2454e-33	1.5653e-32	histidinol-phosphate aminotransferase family protein
SSUSC84_RS09705	11240.5	2358.25	2.2529	2.6072e-63	7.5986e-62	amino acid ABC transporter permease
SSUSC84_RS08320	1480.23	310.876	2.2514	5.1689e-51	1.0942e-49	ABC transporter permease
SSUSC84_RS09135	259.349	55.0748	2.2354	3.4703e-16	1.977e-15	3-isopropylmalate dehydrogenase
SSUSC84_RS03145	581.976	123.724	2.2338	7.083e-40	1.1487e-38	iron ABC transporter permease
SSUSC84_RS09405	999.229	213.809	2.2245	5.4126e-21	4.0615e-20	membrane protein
SSUSC84_RS07085	343.513	74.3182	2.2086	1.9591e-30	2.201e-29	phosphoserine phosphatase SerB
SSUSC84_RS09950	6399.87	1384.78	2.2084	4.9929e-61	1.3755e-59	anaerobic ribonucleoside-triphosphate reductase
SSUSC84_RS05570	2963.12	643.572	2.2029	7.5121e-56	1.865e-54	ATP synthase subunit B
SSUSC84_RS09870	1195.54	260.044	2.2008	5.2263e-48	1.051e-46	cell wall anchor
SSUSC84_RS06545	853.009	186.742	2.1915	5.7605e-43	1.0073e-41	tellurite resistance methyltransferase TehB
SSUSC84_RS08335	3225.38	708.279	2.1871	4.0651e-27	4.0671e-26	lipoprotein
SSUSC84_RS09695	990.815	222.983	2.1517	4.206e-41	6.9903e-40	LacI family transcriptional regulator
SSUSC84_RS04885	54.2546	12.4345	2.1254	1.163e-08	4.005e-08	N-acetyltransferase
SSUSC84_RS09310	1366.76	315.046	2.1171	5.0909e-26	4.7179e-25	transcription termination/antitermination protein NusG
SSUSC84_RS03815	1800.65	417.961	2.1071	1.3487e-20	9.935e-20	KH domain-containing protein
SSUSC84_RS05575	4633.59	1083.21	2.0968	1.0202e-53	2.4423e-52	F0F1 ATP synthase subunit A
SSUSC84_RS09085	78.6852	18.413	2.0954	6.5482e-11	2.6908e-10	hypothetical protein
SSUSC84_RS00560	49.535	11.6806	2.0843	1.1795e-07	3.6945e-07	50S ribosomal protein L36
SSUSC84_RS03925	3926.55	931.954	2.0749	1.5756e-52	3.5603e-51	DeoR/GlpR transcriptional regulator
SSUSC84_RS01365	204.895	50.1458	2.0307	8.9202e-21	6.595e-20	CidA/LrgA family protein
SSUSC84_RS02120	9.14746	2.25244	2.0219	0.02272	0.037055	ComF family protein
SSUSC84_RS00880	14589.5	3613.72	2.0134	1.9567e-52	4.3722e-51	chaperonin GroEL
SSUSC84_RS02255	72.1553	18.0246	2.0011	0.00054201	0.001151	DUF1912 domain-containing protein
SSUSC84_RS03155	2138.05	538.223	1.99	7.9796e-45	1.4722e-43	ABC transporter ATP-binding protein
SSUSC84_RS09595	351.28	89.2148	1.9773	1.3872e-26	1.3477e-25	5-formyltetrahydrofolate cyclo-ligase
SSUSC84_RS05565	1834.68	468.78	1.9685	7.0279e-44	1.2619e-42	ATP synthase subunit delta
SSUSC84_RS05555	10422.7	2675.7	1.9617	4.4599e-50	9.2463e-49	ATP synthase subunit gamma
SSUSC84_RS07320	40.6758	10.5237	1.9505	3.3255e-06	9.1486e-06	sugar ABC transporter permease
SSUSC84_RS02440	330.955	86.663	1.9331	5.9933e-18	3.7901e-17	amino acid ABC transporter ATP-binding protein
SSUSC84_RS00080	34.341	9.06555	1.9215	7.2861e-06	1.9254e-05	hypothetical protein
SSUSC84_RS07310	58.2106	15.3881	1.9195	4.7638e-08	1.5377e-07	sucrose phosphorylase
SSUSC84_RS09770	10851.6	2884.83	1.9113	2.4981e-47	4.9252e-46	metal ABC transporter permease
SSUSC84_RS09865	142.651	38.1021	1.9045	3.3259e-15	1.7836e-14	isopeptide-forming domain-containing fimbrial protein
SSUSC84_RS03095	1394.39	372.485	1.9044	1.9419e-10	7.7332e-10	hypothetical protein
SSUSC84_RS05560	17924	4865.89	1.8811	5.3915e-47	1.0527e-45	ATP synthase subunit alpha
SSUSC84_RS03140	639.034	173.571	1.8804	2.7596e-31	3.2454e-30	iron ABC transporter permease
SSUSC84_RS06485	2668.41	726.694	1.8766	2.6073e-17	1.5841e-16	tRNA guanosine(34) transglycosylase Tgt
SSUSC84_RS10625	88.5124	24.4348	1.8569	6.8198e-08	2.17e-07
SSUSC84_RS08085	1288.61	356.424	1.8542	2.9888e-31	3.4945e-30	transcription elongation factor GreA
SSUSC84_RS02495	134.488	37.4588	1.8441	4.4729e-14	2.2715e-13	hypothetical protein
SSUSC84_RS09710	22602.7	6299.98	1.8431	3.439e-45	6.4036e-44	amino acid ABC transporter substrate-binding protein
SSUSC84_RS01305	2091.14	584.174	1.8398	8.4915e-30	9.2806e-29	NADP-specific glutamate dehydrogenase
SSUSC84_RS08670	309.282	86.5255	1.8377	1.9264e-22	1.5496e-21	hypothetical protein
SSUSC84_RS03735	10363.6	2903.07	1.8359	7.5859e-34	9.779e-33	50S ribosomal protein L21
SSUSC84_RS07315	65.1446	18.3373	1.8289	2.804e-08	9.2441e-08	carbohydrate ABC transporter permease
SSUSC84_RS08360	1422.49	410.642	1.7925	2.421e-22	1.9092e-21	Cof-type HAD-IIB family hydrolase
SSUSC84_RS02260	628.737	182.121	1.7876	2.1846e-18	1.4264e-17	helicase
SSUSC84_RS00675	14.3586	4.16757	1.7846	0.0064112	0.01142	replication initiation factor domain-containing protein
SSUSC84_RS07950	290.766	85.2502	1.7701	2.1347e-19	1.501e-18	ABC transporter ATP-binding protein
SSUSC84_RS04075	632.167	185.575	1.7683	2.7653e-26	2.6231e-25	lysozyme family protein
SSUSC84_RS10665	169.171	49.7813	1.7648	5.0429e-15	2.6688e-14	hypothetical protein
SSUSC84_RS04385	94.4511	28.0671	1.7507	6.1187e-05	0.00014631	ATP-binding protein
SSUSC84_RS02490	2976.11	889.228	1.7428	5.6173e-37	8.3062e-36	collagenase-like protease
SSUSC84_RS00065	586.107	177.587	1.7226	4.6389e-26	4.339e-25	tRNA lysidine(34) synthetase TilS
SSUSC84_RS07280	486.337	147.745	1.7188	6.2251e-24	5.3499e-23	branched-chain amino acid ABC transporter permease
SSUSC84_RS10400	14.0129	4.26242	1.717	0.011819	0.02016	hypothetical protein
SSUSC84_RS08650	116.889	35.6698	1.7124	1.7556e-11	7.4326e-11	lipoprotein
SSUSC84_RS06270	2878.7	880.468	1.7091	2.6758e-35	3.711e-34	polysaccharide biosynthesis protein
SSUSC84_RS01695	4879.42	1494.06	1.7075	1.4089e-11	6.0284e-11	50S ribosomal protein L28
SSUSC84_RS09780	22415.4	6887.25	1.7025	4.5332e-39	7.1782e-38	metal ABC transporter ATP-binding protein
SSUSC84_RS09775	12614.3	3895.18	1.6953	2.3993e-38	3.7695e-37	metal ABC transporter permease
SSUSC84_RS04145	18.8444	5.86483	1.684	0.019925	0.032736	transcriptional regulator
SSUSC84_RS03880	247.311	77.2091	1.6795	1.8173e-17	1.1142e-16	peptidase S8
SSUSC84_RS03455	1408.28	439.848	1.6789	4.1956e-15	2.2321e-14	4-hydroxy-tetrahydrodipicolinate synthase
SSUSC84_RS08660	1845.89	577.3	1.6769	2.3138e-33	2.8901e-32	ribosome-binding factor A
SSUSC84_RS07875	17.081	5.37921	1.6669	0.0056683	0.010223	prepilin peptidase
SSUSC84_RS07665	277.528	87.5116	1.6651	1.0175e-14	5.3008e-14	DUF3272 domain-containing protein
SSUSC84_RS00895	61096.9	19382.3	1.6564	1.5981e-37	2.4347e-36	elongation factor G
SSUSC84_RS03575	30.9685	9.82695	1.656	0.0019232	0.0037513	holin
SSUSC84_RS09785	7507.89	2393.45	1.6493	7.048e-36	1.0124e-34	hypothetical protein
SSUSC84_RS02485	952.709	303.89	1.6485	4.2281e-16	2.3884e-15	peptidase
SSUSC84_RS06680	131.687	42.0365	1.6474	1.6549e-08	5.5839e-08	VanZ family protein
SSUSC84_RS01680	2278.43	728.475	1.6451	2.4927e-33	3.0944e-32	CTP synthase
SSUSC84_RS06880	262.964	84.1376	1.644	5.674e-14	2.8455e-13	serine/threonine transporter SstT
SSUSC84_RS03060	95.4379	30.9114	1.6264	2.9877e-09	1.0845e-08	N-acetyl-beta-hexosaminidase
SSUSC84_RS01375	1918.3	621.672	1.6256	5.7755e-24	4.9847e-23	formate transporter
SSUSC84_RS06365	635.532	206.439	1.6222	5.4118e-24	4.691e-23	ATPase
SSUSC84_RS03740	6010.82	1963.64	1.614	2.2917e-32	2.7433e-31	50S ribosomal protein L27
SSUSC84_RS04880	87.4993	28.6925	1.6086	5.1518e-05	0.00012482	8-oxo-dGTP diphosphatase
SSUSC84_RS04965	95.5806	31.3471	1.6084	1.2439e-07	3.8724e-07	transcriptional antiterminator
SSUSC84_RS09645	69.3899	22.822	1.6043	6.0614e-07	1.7717e-06	L-ascorbate 6-phosphate lactonase
SSUSC84_RS02710	3344.15	1103.05	1.6001	1.9561e-32	2.3556e-31	amino acid ABC transporter ATP-binding protein
SSUSC84_RS10245	238.569	78.8802	1.5967	8.3413e-13	3.9193e-12	YitT family protein
SSUSC84_RS05550	23583.3	7798.52	1.5965	2.6287e-35	3.6711e-34	ATP synthase subunit beta
SSUSC84_RS05295	29.8789	9.89518	1.5943	0.00031964	0.00069945	DUF438 domain-containing protein
SSUSC84_RS08675	101.357	33.6027	1.5928	2.9022e-09	1.0554e-08	DUF448 domain-containing protein
SSUSC84_RS09460	1882.91	625.02	1.591	1.433e-09	5.3464e-09	50S ribosomal protein L34
SSUSC84_RS09285	14421.4	4787.61	1.5908	2.2387e-34	2.9618e-33	elongation factor Ts
SSUSC84_RS02435	142.352	47.7872	1.5748	7.1974e-08	2.2866e-07	amino acid ABC transporter permease
SSUSC84_RS08665	17905.7	6015.91	1.5736	9.7655e-34	1.2351e-32	translation initiation factor IF-2
SSUSC84_RS00420	30.53	10.3239	1.5642	0.00030753	0.00067663	hypothetical protein
SSUSC84_RS02715	8972.16	3051.31	1.556	1.3835e-32	1.6761e-31	glutamine ABC transporter substrate-binding protein
SSUSC84_RS07945	184.777	62.8441	1.5559	7.8353e-13	3.6901e-12	ABC transporter permease
SSUSC84_RS07995	29.4088	10.0135	1.5543	0.0025193	0.004839	hypothetical protein
SSUSC84_RS09075	11534.6	3931.8	1.5527	2.3956e-22	1.8967e-21	30S ribosomal protein S15
SSUSC84_RS08850	685.176	234.761	1.5453	2.5892e-23	2.1605e-22	acetolactate synthase small subunit
SSUSC84_RS09860	349.76	120.739	1.5345	7.4566e-18	4.6569e-17	collagen-binding protein
SSUSC84_RS03675	1686.08	582.32	1.5338	7.462e-28	7.7351e-27	branched-chain amino acid aminotransferase
SSUSC84_RS06610	20.4211	7.07647	1.529	0.0062693	0.011197	PTS glucose transporter subunit IIBC
SSUSC84_RS07395	46.2668	16.0425	1.5281	3.7798e-05	9.2698e-05	ArsR family transcriptional regulator
SSUSC84_RS04165	344.572	120.643	1.5141	1.2114e-09	4.545e-09	hypothetical protein
SSUSC84_RS01370	371.527	130.51	1.5093	3.5752e-18	2.3044e-17	LrgB family protein
SSUSC84_RS09535	52.4941	18.4937	1.5051	1.3893e-05	3.5544e-05	LytTR family transcriptional regulator
SSUSC84_RS00415	51.0092	18.1238	1.4929	0.0002018	0.00045394	hypothetical protein
SSUSC84_RS07010	269.376	96.1093	1.4869	2.4207e-15	1.3157e-14	transcription antiterminator BglG
SSUSC84_RS01425	1776.61	634.411	1.4856	1.2232e-26	1.2e-25	histidine--tRNA ligase
SSUSC84_RS04070	827.585	295.996	1.4833	8.6955e-23	7.0796e-22	nucleoid-associated protein
SSUSC84_RS08495	15258.9	5460.06	1.4827	2.2132e-11	9.3111e-11	enoyl-CoA hydratase
SSUSC84_RS08680	3210.14	1148.88	1.4824	8.4612e-28	8.7259e-27	transcription termination/antitermination protein NusA
SSUSC84_RS08845	2946.79	1055.24	1.4816	9.7204e-24	8.248e-23	ketol-acid reductoisomerase
SSUSC84_RS03450	1849.97	664.026	1.4782	4.4737e-24	3.8946e-23	aspartate-semialdehyde dehydrogenase
SSUSC84_RS06395	4524.79	1628.25	1.4745	3.7107e-28	3.907e-27	penicillin-binding protein 2
SSUSC84_RS09325	3083.73	1111.66	1.472	3.001e-27	3.0175e-26	penicillin-binding protein
SSUSC84_RS07625	853.622	308.183	1.4698	2.2519e-22	1.7899e-21	N-acetyltransferase
SSUSC84_RS04420	1017.81	367.768	1.4686	2.7296e-23	2.2682e-22	tetracycline resistance ribosomal protection protein Tet(M)
SSUSC84_RS03660	679.137	246.564	1.4617	6.7524e-21	5.0293e-20	hypothetical protein
SSUSC84_RS08315	2614.79	954.831	1.4534	1.2863e-26	1.2557e-25	hypothetical protein
SSUSC84_RS10485	62.6768	22.8913	1.4531	4.4559e-06	1.206e-05	conjugal transfer protein
SSUSC84_RS02585	121.284	44.3272	1.4521	0.001328	0.00266	lipoprotein
SSUSC84_RS03150	2481.37	907.337	1.4514	9.326e-27	9.1934e-26	ferrichrome ABC transporter substrate-binding protein
SSUSC84_RS04850	2621.15	964.755	1.442	6.9742e-12	3.0556e-11	glucose-1-phosphate adenylyltransferase
SSUSC84_RS09050	115.703	42.7207	1.4374	9.0887e-09	3.1567e-08	GNAT family acetyltransferase
SSUSC84_RS03080	755.442	279.706	1.4334	2.9477e-10	1.16e-09	hypothetical protein
SSUSC84_RS05400	627.43	232.385	1.4329	1.3213e-19	9.4561e-19	cation transporter
SSUSC84_RS01770	10781.1	4011.28	1.4264	1.2233e-05	3.1458e-05	50S ribosomal protein L19
SSUSC84_RS08330	2135.22	800.97	1.4146	1.156e-24	1.0378e-23	peptidase M20
SSUSC84_RS00075	18053.7	6782.98	1.4123	1.9086e-27	1.9385e-26	ATP-dependent metallopeptidase FtsH/Yme1/Tma family protein
SSUSC84_RS08275	1452.68	546.104	1.4115	4.2977e-23	3.5276e-22	potassium transporter Trk
SSUSC84_RS01535	744.109	280.702	1.4065	2.0102e-17	1.2287e-16	molecular chaperone DnaJ
SSUSC84_RS00995	18889	7140.33	1.4035	1.5512e-27	1.5835e-26	hypothetical protein
SSUSC84_RS04735	3225.52	1226.56	1.3949	1.0789e-09	4.0554e-09	type I DNA topoisomerase
SSUSC84_RS08285	690.11	262.902	1.3923	1.5563e-19	1.102e-18	MATE family efflux transporter
SSUSC84_RS03680	47.5786	18.3014	1.3784	0.00050785	0.0010807	DUF2969 domain-containing protein
SSUSC84_RS09765	50338.8	19472.9	1.3702	1.7203e-26	1.6553e-25	metalloendopeptidase
SSUSC84_RS03780	536.622	207.715	1.3693	0.002537	0.0048635	aspartate carbamoyltransferase
SSUSC84_RS10445	74.8955	29.0151	1.3681	4.5231e-06	1.2226e-05	hypothetical protein
SSUSC84_RS08340	10138	3929.89	1.3672	2.0449e-25	1.8692e-24	gamma-glutamyl-gamma-aminobutyrate hydrolase family protein
SSUSC84_RS01285	1058.23	411.39	1.3631	0.00018987	0.00042758	sodium:alanine symporter family protein
SSUSC84_RS07990	190.109	73.9794	1.3616	4.7086e-11	1.9564e-10	tRNA (cytidine(34)-2'-O)-methyltransferase
SSUSC84_RS02580	92.508	36.0104	1.3612	0.00048133	0.0010275	hypothetical protein
SSUSC84_RS07285	5009.35	1959.16	1.3544	5.8265e-18	3.7079e-17	branched-chain amino acid ABC transporter substrate-binding protein
SSUSC84_RS06755	613.375	240.012	1.3537	1.5121e-17	9.3277e-17	30S ribosomal protein S21
SSUSC84_RS05770	112.572	44.0995	1.352	1.612e-06	4.5917e-06	PTS N-acetylgalactosamine transporter subunit IIA
SSUSC84_RS01960	11070.1	4338.19	1.3515	4.1695e-10	1.6156e-09	DNA-directed RNA polymerase subunit delta
SSUSC84_RS03885	1122.6	440.555	1.3494	3.7693e-19	2.587e-18	subtilisin-like serine protease
SSUSC84_RS06995	164.221	64.9834	1.3375	5.351e-10	2.0497e-09	peptide ABC transporter substrate-binding protein
SSUSC84_RS09890	256.042	101.608	1.3334	4.3872e-12	1.9433e-11	16S rRNA (uracil(1498)-N(3))-methyltransferase
SSUSC84_RS06145	241.392	96.4311	1.3238	9.8411e-06	2.5602e-05	Nif3-like dinuclear metal center hexameric protein
SSUSC84_RS08620	1269.55	508.87	1.319	3.6055e-15	1.9284e-14	hypothetical protein
SSUSC84_RS05545	6318.19	2536.18	1.3169	2.8865e-24	2.5349e-23	ATP synthase epsilon chain
SSUSC84_RS03775	302.751	121.855	1.313	4.1554e-05	0.00010117	bifunctional pyrimidine operon transcriptional regulator/uracil phosphoribosyltransferase
SSUSC84_RS07270	1660.05	668.412	1.3124	4.1553e-21	3.1415e-20	ABC transporter ATP-binding protein
SSUSC84_RS06905	1036.06	419.379	1.3048	6.927e-19	4.6746e-18	ABC transporter ATP-binding protein
SSUSC84_RS00765	47733.9	19324.2	1.3046	2.3688e-24	2.0985e-23	DNA-directed RNA polymerase subunit beta'
SSUSC84_RS05885	34.1438	13.8281	1.304	0.0014814	0.0029352	competence protein CoiA
SSUSC84_RS01965	7944.73	3217.76	1.3039	3.4903e-23	2.8766e-22	DUF3816 family protein
SSUSC84_RS01805	402.389	163.235	1.3016	0.016737	0.027794	galactokinase
SSUSC84_RS03330	1227.98	500.457	1.295	2.9744e-12	1.3442e-11	phosphopantothenate--cysteine ligase
SSUSC84_RS07275	1003.81	410.204	1.2911	1.4234e-18	9.3852e-18	branched-chain amino acid ABC transporter permease
SSUSC84_RS03645	1807.21	741.496	1.2853	1.8878e-20	1.3856e-19	cell filamentation protein Fic
SSUSC84_RS03655	445.964	183.174	1.2837	1.0583e-14	5.4991e-14	DUF1232 domain-containing protein
SSUSC84_RS02320	1441.68	592.373	1.2832	5.6446e-20	4.0832e-19	DUF3165 domain-containing protein
SSUSC84_RS06230	496.814	204.937	1.2775	4.0527e-15	2.1618e-14	5-methyltetrahydropteroyltriglutamate--homocysteine methyltransferase
SSUSC84_RS08855	2825.98	1174.17	1.2671	2.5707e-21	1.9657e-20	acetolactate synthase%2C large subunit%2C biosynthetic type
SSUSC84_RS09025	1443.48	599.894	1.2668	5.8243e-19	3.9436e-18	cysteine--tRNA ligase
SSUSC84_RS03650	1225.03	513.861	1.2534	1.0733e-18	7.147e-18	Fic family protein
SSUSC84_RS03930	2174.82	919.538	1.2419	4.0948e-12	1.8218e-11	1-phosphofructokinase
SSUSC84_RS09040	762.142	329.32	1.2106	1.0996e-15	6.1257e-15	serine O-acetyltransferase
SSUSC84_RS04780	1078.2	467.755	1.2048	1.1861e-16	6.9339e-16	ribonuclease HII
SSUSC84_RS09790	26698.6	11615.3	1.2007	6.1084e-21	4.5666e-20	metal transporter
SSUSC84_RS04520	20.2368	8.81405	1.1991	0.022935	0.037376	hypothetical protein
SSUSC84_RS03110	100.813	43.925	1.1986	2.888e-06	8.0217e-06	D-alanine--poly(phosphoribitol) ligase subunit 2
SSUSC84_RS01405	419.189	183.199	1.1942	9.1208e-13	4.2557e-12	methyl-accepting chemotaxis protein
SSUSC84_RS03770	1143	499.807	1.1934	7.5447e-17	4.4889e-16	hypothetical protein
SSUSC84_RS10230	390.761	171.318	1.1896	1.2324e-12	5.7238e-12	DNA replication and repair protein RecF
SSUSC84_RS01525	531.017	233.059	1.1881	0.0077072	0.013548	nucleotide exchange factor GrpE
SSUSC84_RS00980	218.214	95.8451	1.187	2.3103e-09	8.4627e-09	branched-chain amino acid ABC transporter permease
SSUSC84_RS01000	2968.09	1308.23	1.1819	5.0161e-19	3.4079e-18	DUF1542 domain-containing protein
SSUSC84_RS07640	4499.54	1984.05	1.1813	2.6116e-19	1.8173e-18	S-adenosylmethionine synthase
SSUSC84_RS09035	700.781	309.07	1.181	9.358e-15	4.8881e-14	uridine phosphorylase
SSUSC84_RS01585	561.727	247.823	1.1806	2.6084e-13	1.2609e-12	hydroxymethylpyrimidine/phosphomethylpyrimidine kinase
SSUSC84_RS02315	8561.97	3793.18	1.1745	1.2426e-19	8.9243e-19	translational GTPase TypA
SSUSC84_RS08900	9043.4	4008.83	1.1737	3.4656e-19	2.3868e-18	30S ribosomal protein S9
SSUSC84_RS00395	8047.13	3584.24	1.1668	3.0146e-19	2.0905e-18	arsenate reductase
SSUSC84_RS01400	12434	5572.68	1.1578	2.6675e-10	1.0539e-09	surface-anchored protein
SSUSC84_RS03665	5824.7	2618.01	1.1537	2.9701e-18	1.9267e-17	DNA topoisomerase IV subunit A
SSUSC84_RS08685	995.072	447.665	1.1524	2.4965e-15	1.3532e-14	hypothetical protein
SSUSC84_RS06040	4284.71	1928.44	1.1518	5.3496e-18	3.4153e-17	glycosyl transferase
SSUSC84_RS03670	1649.69	743.449	1.1499	1.2956e-16	7.552e-16	DUF4230 domain-containing protein
SSUSC84_RS04775	1087.95	490.791	1.1484	2.3936e-15	1.3045e-14	YdcF family protein
SSUSC84_RS07200	3882.81	1757.95	1.1432	0.0013323	0.0026633	type B 50S ribosomal protein L31
SSUSC84_RS07620	1861.59	843.411	1.1422	1.4387e-16	8.3619e-16	type I methionyl aminopeptidase
SSUSC84_RS02920	306.806	139.152	1.1407	1.6891e-10	6.7666e-10	hypothetical protein
SSUSC84_RS04170	667.481	303.363	1.1377	1.1887e-07	3.706e-07	hypothetical protein
SSUSC84_RS06035	2269.71	1035.33	1.1324	3.0926e-15	1.6673e-14	glycosyltransferase family 2 protein
SSUSC84_RS08945	5129.68	2343.45	1.1302	3.9141e-05	9.5758e-05	ABC transporter ATP-binding protein
SSUSC84_RS00760	34250.9	15738	1.1219	1.2709e-18	8.435e-18	DNA-directed RNA polymerase subunit beta
SSUSC84_RS03325	739.87	340.458	1.1198	1.517e-08	5.1446e-08	phosphopantothenoylcysteine decarboxylase
SSUSC84_RS08645	289.36	133.149	1.1198	4.9653e-10	1.9092e-09	trimeric intracellular cation channel family protein
SSUSC84_RS02705	1901.37	880.817	1.1101	6.3206e-16	3.5604e-15	amino acid ABC transporter permease
SSUSC84_RS06325	57.9938	26.8749	1.1096	0.0003115	0.00068388	sugar ABC transporter permease
SSUSC84_RS01775	596.652	276.792	1.1081	8.5273e-13	3.9973e-12	hydrolase
SSUSC84_RS01565	301.656	140.152	1.1059	1.8901e-10	7.5415e-10	hypothetical protein
SSUSC84_RS05250	229.082	106.553	1.1043	1.7058e-08	5.7267e-08	SAM-dependent methyltransferase
SSUSC84_RS04835	166.465	77.5246	1.1025	0.0017012	0.0033442	dihydroorotate dehydrogenase
SSUSC84_RS01875	2072.89	969.1	1.0969	8.8063e-16	4.933e-15	hypothetical protein
SSUSC84_RS00745	755.501	353.77	1.0946	3.319e-13	1.5854e-12	HIT family protein
SSUSC84_RS09625	16710.9	7828.62	1.094	1.3455e-17	8.3514e-17	glucose-6-phosphate isomerase
SSUSC84_RS07585	9455.67	4437.67	1.0914	1.7094e-17	1.0512e-16	hypothetical protein
SSUSC84_RS01660	40.9316	19.2665	1.0871	0.0028775	0.0054487	glycosyl transferase
SSUSC84_RS08055	6159.85	2908.68	1.0825	1.0282e-16	6.0818e-16	aminopeptidase C
SSUSC84_RS03285	219.196	103.543	1.082	2.5504e-08	8.4355e-08	DUF3885 domain-containing protein
SSUSC84_RS03725	2078.33	984.529	1.0779	3.1995e-15	1.7204e-14	tRNA 4-thiouridine(8) synthase ThiI
SSUSC84_RS02475	133.612	63.4758	1.0738	1.9876e-06	5.6217e-06	MerR family transcriptional regulator
SSUSC84_RS01380	3505.59	1666.65	1.0727	3.8162e-07	1.1319e-06	aquaporin family protein
SSUSC84_RS07055	66.3094	31.5281	1.0726	0.0002393	0.00053412	hypothetical protein
SSUSC84_RS06070	5194.82	2476.18	1.069	3.855e-16	2.19e-15	rhamnan synthesis protein F
SSUSC84_RS08530	6831.78	3260.36	1.0672	2.1493e-16	1.2349e-15	ribonuclease
SSUSC84_RS01005	6289.9	3004.51	1.0659	1.1684e-16	6.8505e-16	RTX toxin
SSUSC84_RS01135	39.731	18.9873	1.0652	0.0038037	0.0070892	PTS sugar transporter subunit IIC
SSUSC84_RS06095	1895.53	906.987	1.0635	6.8003e-15	3.5706e-14	sulfatase
SSUSC84_RS07000	712.154	341.648	1.0597	2.9184e-12	1.3218e-11	glycoside hydrolase family 1 protein
SSUSC84_RS07730	2816.18	1351.54	1.0591	4.8757e-14	2.4636e-13	hydroxymethylglutaryl-CoA synthase
SSUSC84_RS00040	2479.81	1190.26	1.0589	1.215e-15	6.7494e-15	transcription-repair coupling factor
SSUSC84_RS01590	213.495	102.646	1.0565	6.4027e-08	2.047e-07	membrane protein
SSUSC84_RS07415	1172.27	564	1.0555	1.0415e-13	5.1714e-13	histidine triad protein
SSUSC84_RS09090	593.84	285.893	1.0546	1.015e-11	4.3895e-11	hypothetical protein
SSUSC84_RS00035	317.071	153.061	1.0507	2.8858e-09	1.0513e-08	peptidyl-tRNA hydrolase
SSUSC84_RS03785	886.43	428.167	1.0498	0.0127	0.021498	carbamoyl-phosphate synthase small subunit
SSUSC84_RS06055	2036.82	984.071	1.0495	1.7239e-14	8.8665e-14	glycosyltransferase family 8 protein
SSUSC84_RS04945	27.2643	13.2029	1.0462	0.017934	0.029683	aldose 1-epimerase family protein
SSUSC84_RS02525	1933.63	939.766	1.0409	5.3834e-14	2.7133e-13	efflux RND transporter periplasmic adaptor subunit
SSUSC84_RS01560	70.5173	34.2754	1.0408	0.00013675	0.00031536	transcriptional regulator
SSUSC84_RS09895	263.883	128.669	1.0362	3.3658e-08	1.1006e-07	50S ribosomal protein L11 methyltransferase
SSUSC84_RS08655	820.273	401.455	1.0309	1.7733e-12	8.1234e-12	lipoprotein
SSUSC84_RS03280	220.051	108.029	1.0264	9.5222e-08	2.992e-07	CPBP family intramembrane metalloprotease
SSUSC84_RS07630	2377.48	1168.1	1.0253	3.2694e-07	9.7985e-07	UDP-N-acetylglucosamine 1-carboxyvinyltransferase
SSUSC84_RS01140	53.6153	26.4236	1.0208	0.00099757	0.002045	DUF4838 domain-containing protein
SSUSC84_RS05210	49.3009	24.3329	1.0187	0.002535	0.0048635	hypothetical protein
SSUSC84_RS03595	541.045	268.243	1.0122	2.3172e-07	7.0712e-07	ABC transporter ATP-binding protein
SSUSC84_RS02040	5228.59	2604.27	1.0055	2.6377e-14	1.3463e-13	ribonuclease Y
SSUSC84_RS08905	5481.37	2736.37	1.0023	3.7479e-06	1.0241e-05	50S ribosomal protein L13
SSUSC84_RS02310	5249.2	2621.82	1.0015	2.4266e-14	1.2417e-13	aspartate--ammonia ligase
SSUSC84_RS01200	880.398	1767.51	-1.0055	1.9522e-13	9.5522e-13	ribonuclease HIII
SSUSC84_RS09340	1573.13	3166.08	-1.0091	2.7991e-08	9.2429e-08	pur operon repressor
SSUSC84_RS02275	2436.85	4930.72	-1.0168	1.3307e-14	6.8794e-14	valine--tRNA ligase
SSUSC84_RS06590	2463.43	4986.14	-1.0173	6.5506e-15	3.4485e-14	GTPase Era
SSUSC84_RS10500	83.0611	168.298	-1.0188	1.4335e-06	4.0947e-06	integrase
SSUSC84_RS06240	46.106	93.4883	-1.0198	7.7125e-05	0.00018161	YozE family protein
SSUSC84_RS09430	360.127	730.384	-1.0201	1.3539e-11	5.8053e-11	8-oxo-dGTP diphosphatase
SSUSC84_RS08935	301.778	613.399	-1.0233	2.2741e-11	9.5474e-11	aromatic acid exporter family protein
SSUSC84_RS07495	935.979	1903.58	-1.0242	4.7865e-14	2.4246e-13	ABC transporter permease
SSUSC84_RS08145	646.954	1319.72	-1.0285	3.944e-13	1.8795e-12	transcriptional regulator NrdR
SSUSC84_RS02980	3748.7	7649.08	-1.0289	1.4654e-15	8.0958e-15	pyridoxal phosphate-dependent aminotransferase
SSUSC84_RS05945	620.122	1273.6	-1.0383	1.4112e-13	6.9385e-13	tagatose-bisphosphate aldolase
SSUSC84_RS04490	184.053	381.113	-1.0501	4.1838e-10	1.618e-09	toxin PezT
SSUSC84_RS05145	2593.2	5383.12	-1.0537	1.2551e-15	6.9532e-15	ABC transporter permease
SSUSC84_RS01265	99.8668	207.893	-1.0578	8.9282e-08	2.823e-07	transcriptional regulator
SSUSC84_RS08545	138.214	288.361	-1.061	4.7763e-08	1.5393e-07	sucrose-6-phosphate hydrolase
SSUSC84_RS01810	130.484	272.442	-1.0621	0.0010065	0.002057	UDP-glucose--hexose-1-phosphate uridylyltransferase
SSUSC84_RS06785	1574.15	3289.37	-1.0632	2.1774e-15	1.1899e-14	glycogen/starch/alpha-glucan family phosphorylase
SSUSC84_RS09815	1192.9	2496.79	-1.0656	4.722e-06	1.2729e-05	putative holin-like toxin
SSUSC84_RS01730	526.643	1104.4	-1.0684	9.8342e-09	3.4098e-08	DNA helicase RecG
SSUSC84_RS05470	86.7261	181.929	-1.0688	2.1484e-07	6.5761e-07	glycoside hydrolase family 3 protein
SSUSC84_RS06475	5391.44	11319.7	-1.0701	1.5539e-16	9.0053e-16	catabolite control protein A
SSUSC84_RS05160	960.807	2017.99	-1.0706	2.863e-14	1.4576e-13	cytidine deaminase
SSUSC84_RS01610	85.6098	180.199	-1.0737	0.0011155	0.0022614	Rrf2 family transcriptional regulator
SSUSC84_RS05170	2231.95	4703.71	-1.0755	1.8763e-16	1.0811e-15	pyrimidine-nucleoside phosphorylase
SSUSC84_RS10080	215.904	455.594	-1.0774	0.00079242	0.0016462	beta-glucosidase
SSUSC84_RS02285	461.696	979.212	-1.0847	2.0343e-13	9.9296e-13	cell division protein Fic
SSUSC84_RS10010	2980.69	6341.48	-1.0892	1.4776e-07	4.564e-07	sugar ABC transporter substrate-binding protein
SSUSC84_RS09155	634.706	1359.26	-1.0987	1.9447e-13	9.5386e-13	hypothetical protein
SSUSC84_RS01130	323.836	695.681	-1.1032	3.1627e-11	1.3168e-10	ROK family protein
SSUSC84_RS08445	48922.5	105339	-1.1065	6.8391e-18	4.2846e-17	acetyl-CoA carboxylase biotin carboxylase subunit
SSUSC84_RS09840	527.953	1137.38	-1.1072	7.7006e-15	4.0328e-14	class C sortase
SSUSC84_RS05095	35.8874	77.7828	-1.116	5.1687e-05	0.00012508	DUF4649 domain-containing protein
SSUSC84_RS05480	34.4122	74.5908	-1.1161	7.6076e-05	0.00017935	HAD family hydrolase
SSUSC84_RS09915	1042.82	2260.47	-1.1161	1.1481e-16	6.7507e-16	replication-associated recombination protein A
SSUSC84_RS01385	940.925	2043.53	-1.1189	2.5065e-16	1.4361e-15	DUF853 domain-containing protein
SSUSC84_RS05370	73.677	160.442	-1.1228	1.4797e-07	4.564e-07	DUF1700 domain-containing protein
SSUSC84_RS07455	99.7255	218.337	-1.1305	1.0045e-08	3.477e-08	ASCH domain-containing protein
SSUSC84_RS05140	2785.95	6107.35	-1.1324	4.49e-18	2.8848e-17	ABC transporter permease
SSUSC84_RS08075	60.5531	132.945	-1.1346	6.6877e-07	1.9519e-06	acylphosphatase
SSUSC84_RS06505	3093.39	6793.29	-1.1349	3.5117e-18	2.2708e-17	DNA polymerase I
SSUSC84_RS01615	10.3817	22.9458	-1.1442	0.01857	0.030635	NADP-dependent oxidoreductase
SSUSC84_RS05090	180.081	398.731	-1.1468	8.3801e-12	3.6556e-11	cysteine desulfurase
SSUSC84_RS08355	170.797	379.218	-1.1507	1.2941e-07	4.0223e-07	NCS2 family permease
SSUSC84_RS04795	34.1443	75.8291	-1.1511	5.4156e-05	0.00013059	septum formation inhibitor Maf
SSUSC84_RS06225	1723.34	3845.01	-1.1578	1.7404e-18	1.1401e-17	MFS transporter
SSUSC84_RS07460	11.4536	25.674	-1.1645	0.014536	0.024462	hypothetical protein
SSUSC84_RS07855	536.777	1203.32	-1.1646	1.9459e-05	4.9098e-05	pyruvate formate lyase-activating protein
SSUSC84_RS00740	12.9795	29.1022	-1.1649	0.006556	0.011657	copper chaperone
SSUSC84_RS01220	103.295	232.296	-1.1692	5.6522e-06	1.5095e-05	PTS trehalose transporter subunit IIBC
SSUSC84_RS05475	61.1328	137.849	-1.1731	1.4215e-05	3.6324e-05	beta-hexosamidase
SSUSC84_RS06835	1587.43	3582.31	-1.1742	7.5685e-19	5.0904e-18	tRNA uridine-5-carboxymethylaminomethyl(34) synthesis GTPase MnmE
SSUSC84_RS08140	1541.44	3481.22	-1.1753	1.6141e-18	1.0608e-17	replication initiation/membrane attachment protein
SSUSC84_RS00245	17.2062	38.8764	-1.176	0.011214	0.019275	phosphoribosylglycinamide formyltransferase
SSUSC84_RS00910	17516.1	39585.8	-1.1763	1.5556e-15	8.5707e-15	phosphoglycerate kinase
SSUSC84_RS00385	837.593	1897.14	-1.1795	4.5247e-18	2.8978e-17	damage-inducible protein
SSUSC84_RS03120	132.487	300.696	-1.1825	3.4665e-08	1.1317e-07	low temperature requirement A protein
SSUSC84_RS08830	2652.23	6035.17	-1.1862	9.8841e-12	4.3024e-11	hypothetical protein
SSUSC84_RS05055	1365.14	3108.97	-1.1874	1.5857e-15	8.7127e-15	phosphate acetyltransferase
SSUSC84_RS07560	1725.01	3929.24	-1.1876	2.4867e-19	1.7364e-18	HPr kinase/phosphorylase
SSUSC84_RS09845	338.377	771.257	-1.1886	1.6674e-15	9.1367e-15	class C sortase
SSUSC84_RS09185	1687	3851.13	-1.1908	0.00085887	0.0017788	dihydroxyacetone kinase subunit L
SSUSC84_RS07020	849.56	1948.34	-1.1975	2.5502e-18	1.6597e-17	acetolactate decarboxylase
SSUSC84_RS02245	38.1214	87.5492	-1.1995	6.6975e-06	1.7795e-05	PTS fructose transporter subunit IIA
SSUSC84_RS04380	82.4238	191.001	-1.2124	5.3643e-09	1.8926e-08	hypothetical protein
SSUSC84_RS09495	139.316	323.09	-1.2136	6.7458e-12	2.9685e-11	transcription repressor NadR
SSUSC84_RS09370	730.306	1699.89	-1.2189	8.9884e-19	6.0252e-18	ribosome small subunit-dependent GTPase A
SSUSC84_RS01020	1061.95	2472.05	-1.219	2.3573e-19	1.6518e-18	NAD(P)/FAD-dependent oxidoreductase
SSUSC84_RS01480	408.392	951.344	-1.22	6.8759e-17	4.1153e-16	diphosphomevalonate decarboxylase
SSUSC84_RS02125	4961.23	11561.8	-1.2206	1.1605e-17	7.2255e-17	ribosomal subunit interface protein
SSUSC84_RS08975	12.1259	28.2806	-1.2217	0.0050364	0.0091657	sugar ABC transporter substrate-binding protein
SSUSC84_RS00380	511.28	1194.95	-1.2248	5.8773e-18	3.7285e-17	DNA-3-methyladenine glycosylase I
SSUSC84_RS08135	1335.56	3125.57	-1.2267	1.118e-19	8.0585e-19	primosomal protein DnaI
SSUSC84_RS03430	23.9966	56.3802	-1.2324	0.00015034	0.00034512	formate C-acetyltransferase/glycerol dehydratase family glycyl radical enzyme
SSUSC84_RS04235	30.4926	71.9082	-1.2377	3.3582e-05	8.3043e-05	type II toxin-antitoxin system RelE/ParE family toxin
SSUSC84_RS01750	1345.42	3180.79	-1.2413	2.3056e-08	7.6385e-08	universal stress protein
SSUSC84_RS01270	235.598	558.86	-1.2462	5.0631e-15	2.6724e-14	DUF1430 domain-containing protein
SSUSC84_RS02020	718.437	1707.83	-1.2492	6.7512e-18	4.2427e-17	cell division regulator GpsB
SSUSC84_RS03185	1067.26	2537.88	-1.2497	1.415e-17	8.7557e-17	CBS domain-containing protein
SSUSC84_RS06330	102.537	244.806	-1.2555	9.1486e-11	3.7167e-10	LacI family transcriptional regulator
SSUSC84_RS07520	255.507	613.984	-1.2648	1.0244e-15	5.7227e-15	aminotransferase
SSUSC84_RS07525	157.573	379.39	-1.2677	1.229e-13	6.0724e-13	polyketide cyclase
SSUSC84_RS03025	522.895	1259.91	-1.2687	3.894e-19	2.6635e-18	Crp/Fnr family transcriptional regulator
SSUSC84_RS06420	1129.43	2732.38	-1.2746	3.8514e-21	2.9227e-20	DNA-binding response regulator
SSUSC84_RS07360	64.7442	156.995	-1.2779	7.6371e-09	2.6664e-08	hypothetical protein
SSUSC84_RS08480	6484.61	15744.6	-1.2798	1.1343e-05	2.9281e-05	acyl carrier protein
SSUSC84_RS03125	95.329	232.894	-1.2887	6.3742e-11	2.6311e-10	glutathione S-transferase family protein
SSUSC84_RS01110	184.165	452.481	-1.2969	2.5672e-10	1.0183e-09	NAD(P)-dependent oxidoreductase
SSUSC84_RS02430	627.282	1543.03	-1.2986	6.4094e-05	0.00015239	DUF1797 domain-containing protein
SSUSC84_RS02685	1937.09	4765.25	-1.2987	1.0771e-22	8.7343e-22	FAD-binding oxidoreductase
SSUSC84_RS07530	252.344	620.853	-1.2989	3.6869e-17	2.2265e-16	glycine/betaine ABC transporter permease
SSUSC84_RS08910	715.351	1765.63	-1.3035	7.9734e-21	5.9168e-20	DegV family protein
SSUSC84_RS09055	145.229	358.904	-1.3053	2.1615e-06	6.088e-06	DUF871 domain-containing protein
SSUSC84_RS05165	1396.19	3486.84	-1.3204	3.3963e-23	2.8107e-22	2-deoxyribose-5-phosphate aldolase
SSUSC84_RS08435	19999.1	49973	-1.3212	3.0039e-21	2.2882e-20	acetyl-CoA carboxylase carboxyl transferase subunit alpha
SSUSC84_RS10565	32.2201	80.7468	-1.3254	2.8775e-06	8.0035e-06	maltodextrin phosphorylase
SSUSC84_RS08440	21735.4	54501.3	-1.3262	1.0239e-24	9.2753e-24	acetyl-CoA carboxylase carboxyl transferase subunit beta
SSUSC84_RS00970	14.594	36.679	-1.3296	0.00077129	0.0016073	carbohydrate ABC transporter permease
SSUSC84_RS02665	3110.39	7869.7	-1.3392	9.9461e-25	9.0505e-24	DNA polymerase III subunit alpha
SSUSC84_RS06710	205.249	519.679	-1.3402	7.2296e-17	4.3142e-16	IS200/IS605 family transposase
SSUSC84_RS07710	943.104	2404.18	-1.3501	8.9181e-13	4.1708e-12	IS200/IS605 family transposase
SSUSC84_RS08800	1209.31	3083.99	-1.3506	2.5188e-21	1.9333e-20	Fe-S cluster assembly ATPase SufC
SSUSC84_RS08710	372.655	952.025	-1.3532	5.6308e-20	4.0832e-19	HIT family protein
SSUSC84_RS04890	2656.44	6797.38	-1.3555	2.9613e-24	2.5892e-23	excinuclease ABC subunit B
SSUSC84_RS04375	28.7153	73.7235	-1.3603	3.5544e-06	9.7517e-06	plasmid mobilization relaxosome protein MobC
SSUSC84_RS06235	1245.08	3196.98	-1.3605	6.2672e-24	5.3631e-23	phosphate starvation-inducible protein PhoH
SSUSC84_RS08550	80.4684	206.977	-1.363	1.6506e-11	7.0177e-11	LacI family transcriptional regulator
SSUSC84_RS07060	43446.8	112037	-1.3666	2.3127e-26	2.2147e-25	enolase
SSUSC84_RS05675	6380.34	16457.9	-1.3671	4.7042e-26	4.3797e-25	phosphocarrier protein HPr
SSUSC84_RS07555	1400.55	3616.08	-1.3684	1.6173e-24	1.4455e-23	diacylglyceryl transferase
SSUSC84_RS05585	616.705	1593.44	-1.3695	2.1107e-22	1.6911e-21	diacylglycerol kinase
SSUSC84_RS02415	1016.97	2635.96	-1.374	2.3611e-07	7.1943e-07	DUF1827 domain-containing protein
SSUSC84_RS07065	220.487	572.901	-1.3776	3.1568e-10	1.2399e-09	hypothetical protein
SSUSC84_RS06525	268.231	698.004	-1.3798	1.0749e-11	4.6389e-11	hypothetical protein
SSUSC84_RS05590	645.974	1682.55	-1.3811	5.4646e-23	4.4672e-22	DNA ligase (NAD(+)) LigA
SSUSC84_RS03500	910.333	2377.67	-1.3851	4.812e-06	1.2937e-05	hypothetical protein
SSUSC84_RS07845	2495.57	6540.09	-1.3899	4.7584e-17	2.865e-16	manganese-dependent inorganic pyrophosphatase
SSUSC84_RS05740	20.6367	54.2492	-1.3944	0.011496	0.019708	hyaluronidase
SSUSC84_RS08715	217.085	572.469	-1.3989	1.2924e-18	8.5491e-18	methyl-accepting chemotaxis protein
SSUSC84_RS03005	286.538	756.999	-1.4016	4.3989e-20	3.2051e-19	RidA family protein
SSUSC84_RS01330	111.055	294.158	-1.4053	2.1741e-14	1.1153e-13	membrane protein
SSUSC84_RS02220	795.303	2115.94	-1.4117	4.0974e-16	2.3211e-15	GntR family transcriptional regulator
SSUSC84_RS06415	2006.52	5379.49	-1.4228	4.7671e-27	4.7459e-26	cell wall metabolism sensor histidine kinase VicK
SSUSC84_RS07240	475.438	1275.11	-1.4233	1.1795e-10	4.7727e-10	bifunctional metallophosphatase/5'-nucleotidase
SSUSC84_RS05150	3133.1	8405.99	-1.4238	2.3044e-27	2.3287e-26	ABC transporter ATP-binding protein
SSUSC84_RS04370	365.989	983.209	-1.4257	7.706e-22	6.0065e-21	chromosome segregation ATPase
SSUSC84_RS07870	193.031	518.902	-1.4266	3.0702e-13	1.47e-12	SAM-dependent methyltransferase
SSUSC84_RS02035	491.906	1328.59	-1.4334	2.2515e-17	1.3721e-16	S-ribosylhomocysteine lyase
SSUSC84_RS09725	13.434	36.5586	-1.4443	0.00030941	0.00068003	DUF3284 domain-containing protein
SSUSC84_RS04900	1293.32	3540.4	-1.4528	1.3381e-21	1.0389e-20	DUF2971 domain-containing protein
SSUSC84_RS00255	73.1672	200.597	-1.455	0.015006	0.025127	phosphoribosylamine--glycine ligase
SSUSC84_RS00260	18.3148	50.3158	-1.458	0.0014639	0.0029033	5-(carboxyamino)imidazole ribonucleotide mutase
SSUSC84_RS06495	717.235	1987.03	-1.4701	4.4101e-26	4.1637e-25	CoA-binding protein
SSUSC84_RS04240	21.1095	58.5234	-1.4711	8.9008e-06	2.3337e-05	hypothetical protein
SSUSC84_RS09345	1175.17	3267.67	-1.4754	8.6665e-28	8.892e-27	phosphotransferase
SSUSC84_RS09990	8.71201	24.3094	-1.4804	0.0021303	0.0041232	choline-binding protein
SSUSC84_RS01625	14.7192	41.0782	-1.4807	0.0020224	0.0039371	dehydrogenase
SSUSC84_RS10075	27.989	78.1922	-1.4822	0.0024239	0.0046602	membrane protein
SSUSC84_RS07535	74.7104	210.189	-1.4923	3.0031e-13	1.4448e-12	ABC transporter ATP-binding protein
SSUSC84_RS01515	1286.15	3649.68	-1.5047	1.9051e-29	2.0598e-28	histidine phosphatase family protein
SSUSC84_RS05645	84.6006	241.318	-1.5122	1.2623e-14	6.5423e-14	membrane protein
SSUSC84_RS00935	436.049	1248	-1.5171	1.8938e-25	1.739e-24	hypothetical protein
SSUSC84_RS05730	9.2938	26.6409	-1.5193	0.011301	0.019408	hyaluronidase
SSUSC84_RS08915	235.441	675.605	-1.5208	4.3223e-22	3.3954e-21	NYN domain-containing protein
SSUSC84_RS06515	1926.89	5535.36	-1.5224	1.1634e-30	1.3293e-29	ABC transporter permease
SSUSC84_RS10185	245.478	709.467	-1.5311	3.809e-10	1.4845e-09	LysM domain-containing protein
SSUSC84_RS08615	713.99	2065.03	-1.5322	2.4459e-28	2.6025e-27	lipoate--protein ligase A
SSUSC84_RS06410	1060.32	3073.51	-1.5354	7.5159e-30	8.3046e-29	MBL fold metallo-hydrolase
SSUSC84_RS08785	1039.51	3020.61	-1.5389	8.1869e-30	8.9967e-29	SUF system NifU family Fe-S cluster assembly protein
SSUSC84_RS01195	760.733	2211.39	-1.5395	9.2365e-29	9.8801e-28	signal peptidase I
SSUSC84_RS03015	1361.98	3964	-1.5413	1.8619e-30	2.1035e-29	YvcK family protein
SSUSC84_RS07410	254.727	743.916	-1.5462	2.607e-07	7.8836e-07	PH domain-containing protein
SSUSC84_RS03010	1096.26	3219.51	-1.5542	1.6275e-30	1.8491e-29	RNase adaptor protein RapZ
SSUSC84_RS04100	14.3596	42.2694	-1.5576	4.8213e-05	0.0001171	hypothetical protein
SSUSC84_RS01215	56.2524	165.89	-1.5602	1.351e-11	5.8051e-11	alpha%2Calpha-phosphotrehalase
SSUSC84_RS08500	407.828	1204.46	-1.5624	1.0649e-12	4.9572e-12	HAD family phosphatase
SSUSC84_RS05755	40.0065	118.181	-1.5627	0.00094408	0.0019432	PTS mannose/fructose/sorbose/N-acetylgalactosamine transporter subunit IIC
SSUSC84_RS03890	175.086	517.499	-1.5635	2.3876e-21	1.8396e-20	NAD(P)H-hydrate dehydratase
SSUSC84_RS08535	1195.92	3573.55	-1.5792	3.4756e-28	3.6787e-27	fructokinase
SSUSC84_RS08795	2125.53	6385.56	-1.587	3.347e-33	4.1293e-32	Fe-S cluster assembly protein SufD
SSUSC84_RS01115	84.0181	252.699	-1.5886	9.6382e-11	3.9078e-10	tagatose-6-phosphate kinase
SSUSC84_RS02880	8.56698	25.8596	-1.5938	0.001415	0.002809	hypothetical protein
SSUSC84_RS00265	49.4447	149.866	-1.5998	0.0020947	0.0040622	5-(carboxyamino)imidazole ribonucleotide synthase
SSUSC84_RS06520	225.378	683.46	-1.6005	1.9984e-24	1.7782e-23	ABC transporter ATP-binding protein
SSUSC84_RS09350	1077.03	3268.6	-1.6016	4.3601e-32	5.1883e-31	3'-5' exoribonuclease YhaM
SSUSC84_RS05345	3363.9	10457.5	-1.6363	1.3021e-35	1.844e-34	peptidase T
SSUSC84_RS09190	702.594	2190.13	-1.6403	3.6723e-05	9.0392e-05	PTS-dependent dihydroxyacetone kinase phosphotransferase subunit DhaM
SSUSC84_RS06795	1851.17	5773.09	-1.6409	1.1771e-34	1.578e-33	purine-nucleoside phosphorylase
SSUSC84_RS09730	3.37703	10.5449	-1.6427	0.027601	0.044404	PTS lactose/cellobiose transporter subunit IIA
SSUSC84_RS08780	5166.34	16144.8	-1.6439	5.1149e-36	7.4e-35	Fe-S cluster assembly protein SufB
SSUSC84_RS01620	9.25741	29.0366	-1.6492	0.00040114	0.00086647	alpha/beta hydrolase
SSUSC84_RS03020	1617.3	5107.58	-1.6591	2.0404e-35	2.8695e-34	sporulation protein
SSUSC84_RS09355	1188.36	3757.93	-1.661	7.6034e-35	1.0262e-33	DNA recombination protein RmuC
SSUSC84_RS07540	36.5562	117.298	-1.682	0.0039323	0.0072884	MarR family transcriptional regulator
SSUSC84_RS05750	63.7311	204.596	-1.6827	2.9882e-06	8.2772e-06	PTS N-acetylglucosamine transporter subunit IIBC
SSUSC84_RS03255	388.171	1255.12	-1.6931	2.1976e-21	1.6998e-20	exodeoxyribonuclease III
SSUSC84_RS06790	1531.57	4960.84	-1.6956	2.197e-36	3.2016e-35	purine-nucleoside phosphorylase
SSUSC84_RS06800	515.663	1681.87	-1.7056	8.1058e-33	9.8792e-32	arsenate reductase
SSUSC84_RS01275	313.609	1024.23	-1.7075	4.7945e-27	4.7496e-26	DUF1430 domain-containing protein
SSUSC84_RS00240	27.9167	91.6811	-1.7155	0.0015448	0.0030486	phosphoribosylformylglycinamidine cyclo-ligase
SSUSC84_RS09230	1163.66	3834.68	-1.7204	1.0273e-37	1.5892e-36	bifunctional glutamate--cysteine ligase GshA/glutathione synthetase GshB
SSUSC84_RS10645	13.3251	43.9101	-1.7204	1.0823e-05	2.8013e-05	DUF871 domain-containing protein
SSUSC84_RS09795	1056.12	3518.32	-1.7361	1.6993e-37	2.5694e-36	metal-dependent transcriptional regulator
SSUSC84_RS10675	539.648	1802.34	-1.7398	7.5936e-08	2.4086e-07	6S RNA
SSUSC84_RS00930	5219.71	17513.4	-1.7464	2.8088e-40	4.63e-39	ribonuclease J
SSUSC84_RS05330	3.22991	10.9693	-1.7639	0.022624	0.03693	hypothetical protein
SSUSC84_RS06745	272.846	927.945	-1.766	6.3899e-08	2.0462e-07	large conductance mechanosensitive channel protein MscL
SSUSC84_RS04935	102.879	351.856	-1.774	5.5704e-17	3.3439e-16	hypothetical protein
SSUSC84_RS06805	3005.39	10278.5	-1.774	2.3338e-39	3.7248e-38	phosphopentomutase
SSUSC84_RS02660	188.532	645.104	-1.7747	1.126e-24	1.0154e-23	GntR family transcriptional regulator
SSUSC84_RS04905	916.607	3143.4	-1.7779	1.9699e-09	7.2555e-09	excinuclease ABC subunit B
SSUSC84_RS01280	144.535	497.035	-1.7819	2.051e-09	7.5265e-09	ABC transporter ATP-binding protein
SSUSC84_RS02540	22.3822	77.1119	-1.7846	5.0871e-09	1.8074e-08	LLM class flavin-dependent oxidoreductase
SSUSC84_RS04895	9.87506	34.1968	-1.792	6.0741e-05	0.00014542	UvrB/UvrC motif-containing protein
SSUSC84_RS02195	493.282	1720.82	-1.8026	1.0764e-36	1.58e-35	23S rRNA (uracil(1939)-C(5))-methyltransferase RlmD
SSUSC84_RS10595	80.2369	280.58	-1.8061	3.3598e-17	2.0351e-16	IS630 family transposase
SSUSC84_RS05155	8378.22	29355.9	-1.8089	8.6889e-42	1.4561e-40	BMP family ABC transporter substrate-binding protein
SSUSC84_RS01325	154.49	542.443	-1.812	7.0927e-28	7.3904e-27	membrane protein
SSUSC84_RS08790	2312.18	8155.08	-1.8184	6.12e-35	8.3157e-34	cysteine desulfurase
SSUSC84_RS09500	149.545	530.203	-1.826	1.2809e-12	5.9353e-12	VOC family protein
SSUSC84_RS01630	19.7122	70.1854	-1.8321	2.1525e-06	6.071e-06	NADH:flavin oxidoreductase
SSUSC84_RS09360	333.345	1187.02	-1.8323	4.2483e-35	5.8118e-34	thiamine diphosphokinase
SSUSC84_RS07545	1233.2	4403.02	-1.8361	4.5522e-42	7.758e-41	hypothetical protein
SSUSC84_RS06190	718.249	2569.35	-1.8388	5.3059e-10	2.0363e-09	zinc carboxypeptidase
SSUSC84_RS05715	765.801	2753.41	-1.8462	4.5387e-26	4.2651e-25	LacI family transcriptional regulator
SSUSC84_RS02420	546.979	1966.99	-1.8464	1.1195e-16	6.6022e-16	NUDIX hydrolase
SSUSC84_RS09640	5734.7	20738.2	-1.8545	2.379e-45	4.4712e-44	transketolase
SSUSC84_RS05380	41.5482	150.743	-1.8592	4.2132e-15	2.2355e-14	DUF1304 domain-containing protein
SSUSC84_RS02425	2210.38	8026.99	-1.8606	2.3178e-44	4.2374e-43	ATP-dependent Clp protease ATP-binding subunit
SSUSC84_RS01635	8.36823	30.4469	-1.8633	6.4109e-05	0.00015239	Rrf2 family transcriptional regulator
SSUSC84_RS05725	7.09757	26.0837	-1.8777	0.010936	0.018829	hyaluronidase
SSUSC84_RS02575	728.085	2680.39	-1.8803	7.743e-42	1.3085e-40	N-acetylmuramoyl-L-alanine amidase
SSUSC84_RS08240	345.97	1289.02	-1.8976	3.0782e-38	4.7987e-37	NusG domain II-containing protein
SSUSC84_RS09720	57.0682	213.13	-1.901	9.7569e-19	6.5186e-18	PTS sugar transporter subunit IIC
SSUSC84_RS00235	39.5157	148.122	-1.9063	3.0738e-12	1.386e-11	amidophosphoribosyltransferase
SSUSC84_RS03035	411.596	1546.81	-1.91	0.00076993	0.0016062	N-acetyltransferase
SSUSC84_RS07660	174.214	655.559	-1.9119	1.0139e-16	6.0147e-16	bifunctional biotin--[acetyl-CoA-carboxylase] synthetase/biotin operon repressor
SSUSC84_RS01430	509.693	1958.41	-1.942	4.3358e-12	1.9248e-11	alcohol dehydrogenase AdhP
SSUSC84_RS02230	8.56515	33.0632	-1.9487	0.00093262	0.0019216	PTS system mannose/fructose/N-acetylgalactosamine-transporter subunit IIB
SSUSC84_RS03345	1024.71	3962.71	-1.9513	6.7283e-44	1.219e-42	pyridine nucleotide-disulfide oxidoreductase
SSUSC84_RS01435	2992.69	11760.9	-1.9745	5.6382e-06	1.5078e-05	bifunctional acetaldehyde-CoA/alcohol dehydrogenase
SSUSC84_RS07550	321.31	1267.44	-1.9799	3.8759e-34	5.0944e-33	DUF948 domain-containing protein
SSUSC84_RS04800	2231.27	8821.96	-1.9832	1.6301e-14	8.4054e-14	5'-nucleotidase
SSUSC84_RS00230	99.9804	396.052	-1.986	1.2629e-09	4.7294e-09	phosphoribosylformylglycinamidine synthase
SSUSC84_RS00250	43.6174	174.019	-1.9963	4.8138e-10	1.8581e-09	bifunctional phosphoribosylaminoimidazolecarboxamide formyltransferase/inosine monophosphate cyclohydrolase
SSUSC84_RS00225	7.5689	30.2691	-1.9997	2.1484e-05	5.387e-05	phosphoribosylaminoimidazolesuccinocarboxamide synthase
SSUSC84_RS10520	143.613	584.657	-2.0254	9.102e-34	1.1585e-32	IS630 family transposase
SSUSC84_RS01390	34.5964	142.14	-2.0386	2.8466e-15	1.5388e-14	CoA pyrophosphatase
SSUSC84_RS09835	1758.66	7411.68	-2.0753	7.7323e-54	1.8963e-52	heme-binding protein SntA
SSUSC84_RS05340	1386.66	5865.78	-2.0807	2.0173e-53	4.7171e-52	Cof-type HAD-IIB family hydrolase
SSUSC84_RS06340	42.6744	183.202	-2.102	3.2001e-20	2.3402e-19	glyoxalase/bleomycin resistance/extradiol dioxygenase family protein
SSUSC84_RS01260	873.56	3774.92	-2.1115	1.5684e-12	7.2176e-12	peptide-methionine (R)-S-oxide reductase
SSUSC84_RS05385	188.662	821.073	-2.1217	6.5553e-18	4.1325e-17	transcriptional regulator
SSUSC84_RS09365	539.167	2377.46	-2.1406	1.5878e-51	3.4334e-50	ribulose-phosphate 3-epimerase
SSUSC84_RS09235	1692.27	7462.96	-2.1408	2.0038e-56	5.1661e-55	nuclease
SSUSC84_RS02655	344.214	1525.92	-2.1483	4.4252e-30	4.9439e-29	ABC transporter ATP-binding protein
SSUSC84_RS09275	105.581	473.809	-2.166	1.1928e-34	1.5886e-33	thiol reductase thioredoxin
SSUSC84_RS07590	12.3983	55.853	-2.1715	3.6446e-09	1.3111e-08	SprT family protein
SSUSC84_RS09195	2255.68	10275.3	-2.1875	2.2705e-08	7.5345e-08	aquaporin family protein
SSUSC84_RS07370	3.34012	15.3312	-2.1985	0.0014993	0.0029677	GIY-YIG nuclease family protein
SSUSC84_RS02885	115.14	529.267	-2.2006	2.5756e-29	2.7698e-28	IS66 family insertion sequence hypothetical protein
SSUSC84_RS05745	20.6204	95.774	-2.2156	1.7832e-06	5.0563e-06	preprotein translocase subunit YajC
SSUSC84_RS07600	1392.89	6508.83	-2.2243	1.6513e-60	4.4876e-59	aldo/keto reductase
SSUSC84_RS06335	63.1332	300.748	-2.2521	4.232e-19	2.885e-18	hypothetical protein
SSUSC84_RS08840	2608.68	12444.3	-2.2541	5.4066e-63	1.5532e-61	threonine dehydratase
SSUSC84_RS07040	102.956	500.917	-2.2825	4.8084e-11	1.9937e-10	hypothetical protein
SSUSC84_RS01975	606.09	3098.5	-2.354	6.1884e-63	1.7528e-61	rhodanese domain-containing protein
SSUSC84_RS01555	371.719	1933.98	-2.3793	4.7118e-30	5.235e-29	amino acid ABC transporter permease
SSUSC84_RS02505	68.8636	361.438	-2.3919	8.567e-36	1.2219e-34	hypothetical protein
SSUSC84_RS02650	354.458	1863.31	-2.3942	4.1836e-60	1.1218e-58	hypothetical protein
SSUSC84_RS04025	36.2458	192.986	-2.4126	2.1307e-22	1.7003e-21	4-oxalocrotonate tautomerase
SSUSC84_RS03895	250.626	1337.9	-2.4164	1.5124e-31	1.7891e-30	endonuclease III
SSUSC84_RS01255	1596.52	8559.89	-2.4227	8.5476e-72	3.2433e-70	acetate--CoA ligase
SSUSC84_RS07975	2466	13462.5	-2.4487	4.789e-22	3.7473e-21	acyltransferase
SSUSC84_RS02520	904.991	5083.9	-2.49	1.4107e-72	5.4557e-71	glutathione-disulfide reductase
SSUSC84_RS08835	1953.18	11039.8	-2.4988	6.5988e-52	1.4583e-50	SPFH domain-containing protein
SSUSC84_RS01545	564.586	3343.45	-2.5661	2.763e-73	1.0895e-71	amidase
SSUSC84_RS07970	350.265	2127.15	-2.6024	8.7638e-31	1.0129e-29	membrane protein
SSUSC84_RS02235	11.5625	70.4884	-2.6079	3.1037e-06	8.5736e-06	PTS mannose/fructose/sorbose/N-acetylgalactosamine transporter subunit IIC
SSUSC84_RS09280	291.862	1780.39	-2.6088	4.187e-69	1.4517e-67	hypothetical protein
SSUSC84_RS09000	1.65134	10.2389	-2.6323	0.0031494	0.0059357	alpha-mannosidase
SSUSC84_RS00770	122.92	790.78	-2.6856	6.4779e-59	1.6918e-57	LD-carboxypeptidase
SSUSC84_RS02240	11.6707	76.2255	-2.7074	4.0235e-08	1.3072e-07	PTS fructose transporter subunit IID
SSUSC84_RS01540	179.128	1187.28	-2.7286	1.0788e-49	2.2138e-48	lipoate--protein ligase family protein
SSUSC84_RS01340	32.8194	225.655	-2.7815	5.0595e-34	6.5643e-33	TetR/AcrR family transcriptional regulator
SSUSC84_RS07610	189.554	1341.67	-2.8233	9.9967e-31	1.1488e-29	GtrA family protein
SSUSC84_RS03490	16.2463	118.887	-2.8714	1.3595e-22	1.098e-21	hypothetical protein
SSUSC84_RS05445	96.7692	723.115	-2.9016	1.6596e-16	9.5906e-16	hypothetical protein
SSUSC84_RS01250	1350.25	10263.4	-2.9262	4.8285e-46	9.2477e-45	thioredoxin
SSUSC84_RS03485	22.3263	174.798	-2.9689	8.2793e-31	9.6241e-30	2%2C6-dichloro-p-hydroquinone 1%2C2-dioxygenase
SSUSC84_RS01550	600.781	5197.73	-3.113	2.8693e-105	3.2056e-103	ABC transporter substrate-binding protein
SSUSC84_RS05105	123.334	1087.39	-3.1402	3.5154e-40	5.7476e-39	peptidase
SSUSC84_RS02720	146.952	1436.16	-3.2888	1.4756e-51	3.2254e-50	MBL fold metallo-hydrolase
SSUSC84_RS08630	1951.97	19088.5	-3.2897	2.0912e-70	7.6461e-69	branched-chain alpha-keto acid dehydrogenase subunit E2
SSUSC84_RS08635	1251.29	13041.3	-3.3816	3.7527e-117	6.2889e-115	alpha-ketoacid dehydrogenase subunit beta
SSUSC84_RS08640	679.177	7278.22	-3.4217	2.1662e-126	4.8403e-124	pyruvate dehydrogenase E1 component subunit alpha
SSUSC84_RS04670	0.616873	6.6756	-3.4359	0.0096829	0.016786	conjugal transfer protein TrbL
SSUSC84_RS08625	2548.31	28661.3	-3.4915	3.3358e-68	1.1181e-66	dihydrolipoyl dehydrogenase
SSUSC84_RS03040	690.545	8127.74	-3.557	5.6521e-09	1.9871e-08	ornithine carbamoyltransferase
SSUSC84_RS05100	374.287	4599.59	-3.6193	3.883e-83	2.519e-81	redox-sensing transcriptional repressor Rex
SSUSC84_RS07245	1050.79	14927.1	-3.8284	2.0581e-63	6.0864e-62	superoxide dismutase
SSUSC84_RS10370	0.690169	10.3361	-3.9046	0.00023393	0.00052329	IS110 family transposase
SSUSC84_RS07965	131.529	2293.42	-4.1241	7.6538e-43	1.3269e-41	low molecular weight phosphotyrosine protein phosphatase
SSUSC84_RS06530	127.449	2302.36	-4.1751	1.1542e-90	8.927e-89	thiol peroxidase
SSUSC84_RS03505	1677.42	31424.4	-4.2276	7.4583e-187	7.4993e-184	NADH oxidase
SSUSC84_RS07960	653.251	13408	-4.3593	3.6915e-75	1.6497e-73	CsbD family protein
SSUSC84_RS03045	80.3387	2449.42	-4.9302	2.5101e-13	1.2174e-12	carbamate kinase
SSUSC84_RS03050	72.0966	2632.06	-5.1901	8.5926e-11	3.4979e-10	YfcC family protein
