# Supplementary material for: Transcriptomic Analysis of <em>Streptococcus suis</em> in Response to Ferrous Iron and Cobalt Toxicity
Source: Preprints.org preprint supplement (doi:10.20944/preprints202008.0708.v1), 2020-08-31
Supplement: Supplementary file 6 [file Table S3.xlsx]

## Sheet: CovsNor.DEG
Table S3. Summary of the differentially expressed genes in the presence of cobalt.
Gene_id	readcount_Co	readcount_Nor	log2FoldChange	pval	padj	description
SSUSC84_RS01570	58317.1	172.255	8.4032	0	0	heavy metal translocating P-type ATPase
SSUSC84_RS07950	599.416	87.6859	2.7731	7.6912e-52	7.722e-49	ABC transporter ATP-binding protein
SSUSC84_RS07945	378.82	64.6421	2.551	9.5509e-39	4.7946e-36	ABC transporter permease
SSUSC84_RS06380	423.7	89.4099	2.2445	5.8351e-34	2.3434e-31	OsmC family peroxiredoxin
SSUSC84_RS07400	2746.5	632.781	2.1178	1.2659e-16	1.5887e-14	ATP-dependent helicase
SSUSC84_RS07955	31055.1	7844.52	1.9851	8.2471e-46	5.5201e-43	DNA starvation/stationary phase protection protein
SSUSC84_RS00445	1731.76	477.273	1.8594	8.1618e-06	6.4019e-05	50S ribosomal protein L23
SSUSC84_RS05580	552.076	162.982	1.7602	1.0914e-08	1.8893e-07	F0F1 ATP synthase subunit C
SSUSC84_RS00430	2097.23	630.552	1.7338	4.863e-29	1.6275e-26	30S ribosomal protein S10
SSUSC84_RS00435	5330.88	1605.24	1.7316	1.9311e-12	1.0204e-10	50S ribosomal protein L3
SSUSC84_RS00455	5136.91	1587.13	1.6945	0.00010848	0.00058873	30S ribosomal protein S19
SSUSC84_RS00550	1503.27	471.272	1.6735	1.5051e-05	0.00010717	adenylate kinase
SSUSC84_RS00460	1992.78	625.512	1.6717	0.00013717	0.00072235	50S ribosomal protein L22
SSUSC84_RS03705	429.363	137.197	1.646	9.0691e-21	1.6555e-18	threonine aldolase
SSUSC84_RS10115	852.104	272.534	1.6446	1.6763e-05	0.00011728	hypothetical protein
SSUSC84_RS00440	4736.39	1540.62	1.6203	2.7543e-10	7.4738e-09	50S ribosomal protein L4
SSUSC84_RS00450	11598	3808.26	1.6067	6.3453e-07	6.9625e-06	50S ribosomal protein L2
SSUSC84_RS06470	3565.08	1178.7	1.5967	1.3055e-28	3.7448e-26	surface-anchored protein
SSUSC84_RS10590	28.472	9.42023	1.5957	0.00025271	0.0012004	IS630 family transposase
SSUSC84_RS00425	48.8686	16.6471	1.5536	9.3924e-06	7.0902e-05	hypothetical protein
SSUSC84_RS03745	25.8199	8.88267	1.5394	0.001293	0.0048501	GNAT family N-acetyltransferase
SSUSC84_RS07425	2754.06	964.035	1.5144	2.4866e-14	1.9204e-12	membrane protein
SSUSC84_RS09305	1668.77	588.347	1.504	0.00065833	0.0027369	serine protease
SSUSC84_RS07430	2086.86	744.448	1.4871	9.4685e-25	2.3766e-22	phosphomethylpyrimidine kinase
SSUSC84_RS05570	1853.8	661.92	1.4858	9.074e-14	6.5074e-12	ATP synthase subunit B
SSUSC84_RS00185	242.58	87.0394	1.4787	8.5802e-12	3.3782e-10	rod shape-determining protein MreC
SSUSC84_RS04885	34.6215	12.7872	1.437	0.00040678	0.0017992	N-acetyltransferase
SSUSC84_RS07085	205.41	76.4439	1.426	2.9032e-10	7.6704e-09	phosphoserine phosphatase SerB
SSUSC84_RS00480	1884.41	713.273	1.4016	0.0044514	0.014099	30S ribosomal protein S17
SSUSC84_RS00465	6260.82	2370.85	1.4009	2.9837e-05	0.00019516	30S ribosomal protein S3
SSUSC84_RS05575	2931.69	1114.08	1.3959	4.7175e-16	4.7364e-14	F0F1 ATP synthase subunit A
SSUSC84_RS06545	499.034	192.044	1.3777	7.7628e-16	7.4227e-14	tellurite resistance methyltransferase TehB
SSUSC84_RS10105	45.6691	17.8192	1.3578	0.016592	0.042935	thiol reductase thioredoxin
SSUSC84_RS05935	143.309	56.0367	1.3547	2.4777e-09	4.9753e-08	lipoprotein
SSUSC84_RS10110	6272.09	2460.33	1.3501	3.816e-10	9.6994e-09	30S ribosomal protein S4
SSUSC84_RS06145	249.547	99.201	1.3309	2.0617e-06	1.8564e-05	Nif3-like dinuclear metal center hexameric protein
SSUSC84_RS08360	1059.78	422.329	1.3273	2.9011e-15	2.4273e-13	Cof-type HAD-IIB family hydrolase
SSUSC84_RS05665	828.573	336.195	1.3013	0.00020914	0.0010344	DUF1846 domain-containing protein
SSUSC84_RS00470	3619.98	1478.75	1.2916	0.00012459	0.00066183	50S ribosomal protein L16
SSUSC84_RS09700	9567.01	3919.03	1.2876	6.0086e-18	9.281e-16	amino acid ABC transporter ATP-binding protein
SSUSC84_RS02495	93.7791	38.5277	1.2834	0.00075029	0.0030498	hypothetical protein
SSUSC84_RS00875	905.29	375.571	1.2693	9.7242e-08	1.3105e-06	co-chaperone GroES
SSUSC84_RS04910	3535.75	1476.39	1.2599	4.0023e-19	6.6971e-17	amino acid ABC transporter permease
SSUSC84_RS04965	76.7137	32.2416	1.2506	0.011895	0.032146	transcriptional antiterminator
SSUSC84_RS03175	30.7958	12.985	1.2459	0.0029347	0.0098544	DNA internalization-related competence protein ComEC/Rec2
SSUSC84_RS02255	43.8483	18.5374	1.2421	0.00078259	0.0031492	DUF1912 domain-containing protein
SSUSC84_RS01585	602.548	254.906	1.2411	3.2521e-14	2.4186e-12	hydroxymethylpyrimidine/phosphomethylpyrimidine kinase
SSUSC84_RS06485	1752.79	747.398	1.2297	1.0346e-16	1.385e-14	tRNA guanosine(34) transglycosylase Tgt
SSUSC84_RS09140	104.483	44.5706	1.2291	1.0136e-06	1.0126e-05	2-isopropylmalate synthase
SSUSC84_RS06680	101.319	43.2434	1.2284	0.00086183	0.0034405	VanZ family protein
SSUSC84_RS03820	444.599	189.834	1.2278	0.00089901	0.0035676	ABC transporter ATP-binding protein
SSUSC84_RS00555	5709.64	2441.75	1.2255	9.6027e-11	2.878e-09	translation initiation factor IF-1
SSUSC84_RS00490	3719.42	1594.76	1.2217	0.0031657	0.010524	50S ribosomal protein L24
SSUSC84_RS03090	239.548	102.889	1.2192	6.5343e-10	1.562e-08	hypothetical protein
SSUSC84_RS07280	351.691	151.966	1.2106	1.5039e-11	5.4907e-10	branched-chain amino acid ABC transporter permease
SSUSC84_RS00485	6106.81	2646.59	1.2063	0.00074883	0.0030498	50S ribosomal protein L14
SSUSC84_RS02490	2100.43	914.527	1.1996	5.034e-10	1.2327e-08	collagenase-like protease
SSUSC84_RS05995	466.954	205.3	1.1855	0.00014543	0.00075652	50S ribosomal protein L35
SSUSC84_RS07605	768.991	338.102	1.1855	4.233e-11	1.3492e-09	queuosine transporter QueT
SSUSC84_RS00475	274.849	120.989	1.1838	0.010449	0.028939	50S ribosomal protein L29
SSUSC84_RS05565	1092.63	482.099	1.1804	3.7425e-11	1.2121e-09	ATP synthase subunit delta
SSUSC84_RS01365	116.503	51.5652	1.1759	6.1889e-07	6.9041e-06	CidA/LrgA family protein
SSUSC84_RS09400	1620.23	721.002	1.1681	5.4157e-09	1.0069e-07	sulfatase
SSUSC84_RS03825	723.083	323.155	1.1619	0.0019267	0.0067753	ABC transporter ATP-binding protein
SSUSC84_RS06000	3808.37	1704.39	1.1599	3.5649e-10	9.1774e-09	translation initiation factor IF-3
SSUSC84_RS08600	3508.96	1575.27	1.1554	6.4358e-12	2.6923e-10	single-stranded DNA-binding protein
SSUSC84_RS00190	63.6068	28.6758	1.1493	9.4916e-05	0.00052649	rod shape-determining protein MreD
SSUSC84_RS00885	5453.04	2467.15	1.1442	3.0482e-16	3.4005e-14	30S ribosomal protein S12
SSUSC84_RS09535	42.0402	19.0211	1.1442	0.000942	0.0037016	LytTR family transcriptional regulator
SSUSC84_RS00505	1723.86	783.81	1.1371	0.0094055	0.026537	hypothetical protein
SSUSC84_RS03920	184.684	84.5204	1.1277	5.8339e-08	8.3675e-07	histidinol-phosphate aminotransferase family protein
SSUSC84_RS09705	5272.46	2425.03	1.1205	4.5808e-16	4.7364e-14	amino acid ABC transporter permease
SSUSC84_RS10430	44.3415	20.4693	1.1152	0.0019493	0.0068311	teichoic acid D-Ala incorporation-associated protein DltX
SSUSC84_RS08325	895.697	413.713	1.1144	2.504e-13	1.6219e-11	methionine ABC transporter ATP-binding protein
SSUSC84_RS08605	1710.54	794.208	1.1069	9.8259e-14	6.8036e-12	30S ribosomal protein S6
SSUSC84_RS03900	449.978	210.35	1.0971	0.0044491	0.014099	MATE family efflux transporter
SSUSC84_RS05560	10696.2	5004.23	1.0959	3.0226e-07	3.6344e-06	ATP synthase subunit alpha
SSUSC84_RS02440	190.098	89.1286	1.0928	3.6305e-08	5.565e-07	amino acid ABC transporter ATP-binding protein
SSUSC84_RS07625	673.806	316.962	1.088	8.2013e-12	3.2936e-10	N-acetyltransferase
SSUSC84_RS00565	3708.83	1759.51	1.0758	5.0537e-11	1.5856e-09	30S ribosomal protein S13
SSUSC84_RS03455	953.307	452.299	1.0757	2.1909e-12	1.128e-10	4-hydroxy-tetrahydrodipicolinate synthase
SSUSC84_RS03330	1079.41	514.725	1.0684	4.3806e-12	1.9872e-10	phosphopantothenate--cysteine ligase
SSUSC84_RS05925	187.178	89.4185	1.0658	4.0784e-07	4.7891e-06	ABC transporter permease
SSUSC84_RS05930	198.157	94.8226	1.0633	1.3446e-06	1.2673e-05	lipoprotein
SSUSC84_RS00575	14553.8	7024.72	1.0509	1.758e-14	1.412e-12	DNA-directed RNA polymerase subunit alpha
SSUSC84_RS09085	39.1693	18.9407	1.0482	0.018157	0.046094	hypothetical protein
SSUSC84_RS01560	72.8024	35.2473	1.0465	0.00087629	0.0034843	transcriptional regulator
SSUSC84_RS05500	28.2722	13.6913	1.0461	0.00774	0.02246	2-dehydro-3-deoxy-phosphogluconate aldolase
SSUSC84_RS01580	494.203	241.067	1.0357	6.2187e-10	1.5045e-08	tRNA pseudouridine(38-40) synthase TruA
SSUSC84_RS01420	1347.39	658.984	1.0319	8.1878e-08	1.1339e-06	50S ribosomal protein L32
SSUSC84_RS05990	1781.34	872.24	1.0302	1.2545e-09	2.7087e-08	50S ribosomal protein L20
SSUSC84_RS04945	27.6633	13.5747	1.0271	0.011461	0.031269	aldose 1-epimerase family protein
SSUSC84_RS01535	587.725	288.704	1.0255	9.2536e-07	9.407e-06	molecular chaperone DnaJ
SSUSC84_RS02710	2285.65	1134.38	1.0107	9.7728e-13	5.6068e-11	amino acid ABC transporter ATP-binding protein
SSUSC84_RS09290	7443.86	3710.92	1.0043	2.2918e-13	1.5339e-11	30S ribosomal protein S2
SSUSC84_RS05555	5510.65	2751.75	1.0019	9.9751e-05	0.00054877	ATP synthase subunit gamma
SSUSC84_RS05755	60.4252	121.576	-1.0086	0.015368	0.040129	PTS mannose/fructose/sorbose/N-acetylgalactosamine transporter subunit IIC
SSUSC84_RS08835	5634.18	11353.6	-1.0109	3.9986e-12	1.8673e-10	SPFH domain-containing protein
SSUSC84_RS09795	1790.75	3618.35	-1.0148	3.152e-13	1.9179e-11	metal-dependent transcriptional regulator
SSUSC84_RS05445	367.6	743.594	-1.0164	0.00017165	0.0008726	hypothetical protein
SSUSC84_RS05645	122.556	248.191	-1.018	4.3915e-08	6.5304e-07	membrane protein
SSUSC84_RS06330	124.294	251.763	-1.0183	6.2382e-08	8.8839e-07	LacI family transcriptional regulator
SSUSC84_RS05380	76.2852	155.017	-1.0229	1.1089e-06	1.0915e-05	DUF1304 domain-containing protein
SSUSC84_RS00700	26.4338	53.8429	-1.0264	0.0010701	0.0041245	hypothetical protein
SSUSC84_RS07245	7508.76	15350.5	-1.0316	1.0484e-09	2.3135e-08	superoxide dismutase
SSUSC84_RS10675	906.367	1853.36	-1.032	0.0015361	0.0055761	6S RNA
SSUSC84_RS02720	717.092	1476.9	-1.0423	1.795e-09	3.7545e-08	MBL fold metallo-hydrolase
SSUSC84_RS01810	135.701	280.211	-1.0461	0.0025352	0.0086281	UDP-glucose--hexose-1-phosphate uridylyltransferase
SSUSC84_RS07065	284.779	589.138	-1.0488	1.2225e-06	1.1797e-05	hypothetical protein
SSUSC84_RS07970	1052.29	2187.6	-1.0558	1.8495e-09	3.8287e-08	membrane protein
SSUSC84_RS10595	136.141	288.571	-1.0838	5.7359e-09	1.0471e-07	IS630 family transposase
SSUSC84_RS10520	282.592	601.31	-1.0894	1.1994e-11	4.6315e-10	IS630 family transposase
SSUSC84_RS01250	4957.74	10554.9	-1.0902	6.6713e-09	1.1961e-07	thioredoxin
SSUSC84_RS04935	168.681	361.832	-1.101	9.7158e-10	2.1921e-08	hypothetical protein
SSUSC84_RS06475	5426.61	11641.2	-1.1011	1.2249e-15	1.118e-13	catabolite control protein A
SSUSC84_RS05745	45.9161	98.5133	-1.1013	0.0049975	0.015582	preprotein translocase subunit YajC
SSUSC84_RS04100	20.2446	43.4736	-1.1026	0.0012267	0.0046213	hypothetical protein
SSUSC84_RS00740	13.8942	29.9355	-1.1074	0.0051398	0.015952	copper chaperone
SSUSC84_RS10565	38.4201	83.0373	-1.1119	2.6087e-05	0.00017345	maltodextrin phosphorylase
SSUSC84_RS03895	631.067	1375.88	-1.1245	9.0143e-11	2.7847e-09	endonuclease III
SSUSC84_RS02660	302.958	663.407	-1.1308	1.2125e-12	6.5801e-11	GntR family transcriptional regulator
SSUSC84_RS07975	6319.64	13845.3	-1.1315	3.7325e-08	5.6698e-07	acyltransferase
SSUSC84_RS01220	108.447	238.877	-1.1393	8.9356e-06	6.8223e-05	PTS trehalose transporter subunit IIBC
SSUSC84_RS08540	154.394	340.514	-1.1411	1.8175e-10	5.0688e-09	PTS beta-glucoside transporter subunit IIBCA
SSUSC84_RS09720	98.669	219.214	-1.1517	9.8076e-09	1.7125e-07	PTS sugar transporter subunit IIC
SSUSC84_RS03500	1100.37	2444.94	-1.1518	4.8319e-05	0.00029062	hypothetical protein
SSUSC84_RS07610	619.829	1379.93	-1.1547	1.2214e-09	2.6659e-08	GtrA family protein
SSUSC84_RS01750	1463.08	3270.96	-1.1607	1.8653e-08	3.0452e-07	universal stress protein
SSUSC84_RS01360	45.5796	102.05	-1.1628	7.6509e-06	6.0247e-05	PadR family transcriptional regulator
SSUSC84_RS05750	93.7457	210.45	-1.1666	0.00033104	0.0015005	PTS N-acetylglucosamine transporter subunit IIBC
SSUSC84_RS02650	835.259	1916.26	-1.198	1.8017e-16	2.1281e-14	hypothetical protein
SSUSC84_RS09725	16.3721	37.5987	-1.1994	0.0011048	0.0042257	DUF3284 domain-containing protein
SSUSC84_RS01340	100.802	232.058	-1.203	1.034e-09	2.3071e-08	TetR/AcrR family transcriptional regulator
SSUSC84_RS08230	12.0907	27.9321	-1.208	0.0065179	0.019564	hypothetical protein
SSUSC84_RS10645	19.4965	45.1577	-1.2118	0.00041491	0.0018311	DUF871 domain-containing protein
SSUSC84_RS07960	5861.13	13788.3	-1.2342	2.6577e-13	1.6677e-11	CsbD family protein
SSUSC84_RS02655	664.637	1569.21	-1.2394	1.8936e-15	1.6532e-13	ABC transporter ATP-binding protein
SSUSC84_RS10010	2748.12	6521.46	-1.2468	4.5523e-12	1.9872e-10	sugar ABC transporter substrate-binding protein
SSUSC84_RS03185	1093.94	2609.91	-1.2545	4.7721e-17	6.8445e-15	CBS domain-containing protein
SSUSC84_RS07965	984.975	2358.62	-1.2598	2.4759e-09	4.9753e-08	low molecular weight phosphotyrosine protein phosphatase
SSUSC84_RS02230	14.1876	34.0106	-1.2613	0.0047737	0.014931	PTS system mannose/fructose/N-acetylgalactosamine-transporter subunit IIB
SSUSC84_RS07660	280.941	674.139	-1.2628	4.1543e-10	1.0427e-08	bifunctional biotin--[acetyl-CoA-carboxylase] synthetase/biotin operon repressor
SSUSC84_RS02505	153.948	371.702	-1.2717	1.8099e-11	6.3761e-10	hypothetical protein
SSUSC84_RS00960	100.249	243.612	-1.281	6.2708e-06	5.0166e-05	sugar ABC transporter substrate-binding protein
SSUSC84_RS02125	4714.62	11890	-1.3345	4.3884e-22	8.8119e-20	ribosomal subunit interface protein
SSUSC84_RS02885	203.38	544.317	-1.4203	4.5462e-12	1.9872e-10	IS66 family insertion sequence hypothetical protein
SSUSC84_RS05100	1667.18	4730.14	-1.5045	6.3569e-24	1.4183e-21	redox-sensing transcriptional repressor Rex
SSUSC84_RS02235	25.0649	72.5073	-1.5325	0.0009059	0.0035879	PTS mannose/fructose/sorbose/N-acetylgalactosamine transporter subunit IIC
SSUSC84_RS09190	706.051	2252.79	-1.6739	3.8496e-05	0.00024232	PTS-dependent dihydroxyacetone kinase phosphotransferase subunit DhaM
SSUSC84_RS09185	1221.66	3961.18	-1.6971	2.264e-05	0.00015463	dihydroxyacetone kinase subunit L
SSUSC84_RS09195	3197.38	10569.1	-1.7249	1.9859e-06	1.8126e-05	aquaporin family protein
SSUSC84_RS02240	23.6425	78.4117	-1.7297	2.8456e-05	0.00018734	PTS fructose transporter subunit IID
SSUSC84_RS09990	7.01546	25.0001	-1.8333	0.00013742	0.00072235	choline-binding protein
SSUSC84_RS05735	3.27042	11.963	-1.871	0.0080777	0.023271	hyaluronidase
SSUSC84_RS03035	364.175	1590.89	-2.1271	0.00025348	0.0012004	N-acetyltransferase
SSUSC84_RS03040	1718.79	8359.58	-2.282	1.8041e-05	0.00012579	ornithine carbamoyltransferase
SSUSC84_RS10370	2.06892	10.6322	-2.3615	0.0043177	0.013784	IS110 family transposase
SSUSC84_RS03045	451.544	2519.36	-2.4801	4.1256e-06	3.4233e-05	carbamate kinase
SSUSC84_RS09730	1.78599	10.8455	-2.6023	0.0018282	0.0064859	PTS lactose/cellobiose transporter subunit IIA
SSUSC84_RS03050	363.278	2707.29	-2.8977	1.2448e-05	9.0893e-05	YfcC family protein
