# Supplementary material for: Transcriptomic Analysis of <em>Streptococcus suis</em> in Response to Ferrous Iron and Cobalt Toxicity
Source: Preprints.org preprint supplement (doi:10.20944/preprints202008.0708.v1), 2020-08-31
Supplement: Supplementary file 8 [file Table S4.xlsx]

## Sheet: CovsNor.DEG
Table S4. Summary of the DEGs that expressed in the same trends in the presence of cobalt and ferrous iron.
Gene_id	log2FoldChange_Co	log2FoldChange_Fe	description
SSUSC84_RS00185	1.4787	2.9886	rod shape-determining protein MreC
SSUSC84_RS00190	1.1493	2.9918	rod shape-determining protein MreD
SSUSC84_RS00425	1.5536	2.7292	hypothetical protein
SSUSC84_RS00430	1.7338	3.2419	30S ribosomal protein S10
SSUSC84_RS00435	1.7316	3.3308	50S ribosomal protein L3
SSUSC84_RS00440	1.6203	3.357	50S ribosomal protein L4
SSUSC84_RS00445	1.8594	3.5694	50S ribosomal protein L23
SSUSC84_RS00450	1.6067	3.4068	50S ribosomal protein L2
SSUSC84_RS00455	1.6945	3.4537	30S ribosomal protein S19
SSUSC84_RS00460	1.6717	3.4511	50S ribosomal protein L22
SSUSC84_RS00465	1.4009	3.2393	30S ribosomal protein S3
SSUSC84_RS00470	1.2916	3.1661	50S ribosomal protein L16
SSUSC84_RS00475	1.1838	3.0841	50S ribosomal protein L29
SSUSC84_RS00480	1.4016	3.2479	30S ribosomal protein S17
SSUSC84_RS00485	1.2063	3.0652	50S ribosomal protein L14
SSUSC84_RS00490	1.2217	3.1457	50S ribosomal protein L24
SSUSC84_RS00505	1.1371	3.1084	hypothetical protein
SSUSC84_RS00550	1.6735	3.5586	adenylate kinase
SSUSC84_RS00555	1.2255	2.4796	translation initiation factor IF-1
SSUSC84_RS00565	1.0758	2.5095	30S ribosomal protein S13
SSUSC84_RS00575	1.0509	2.5327	DNA-directed RNA polymerase subunit alpha
SSUSC84_RS00740	-1.1074	-1.1649	copper chaperone
SSUSC84_RS00875	1.2693	2.5489	co-chaperone GroES
SSUSC84_RS00885	1.1442	3.1092	30S ribosomal protein S12
SSUSC84_RS01220	-1.1393	-1.1692	PTS trehalose transporter subunit IIBC
SSUSC84_RS01250	-1.0902	-2.9262	thioredoxin
SSUSC84_RS01340	-1.203	-2.7815	TetR/AcrR family transcriptional regulator
SSUSC84_RS01365	1.1759	2.0307	CidA/LrgA family protein
SSUSC84_RS01420	1.0319	2.3543	50S ribosomal protein L32
SSUSC84_RS01535	1.0255	1.4065	molecular chaperone DnaJ
SSUSC84_RS01560	1.0465	1.0408	transcriptional regulator
SSUSC84_RS01570	8.4032	7.5085	heavy metal translocating P-type ATPase
SSUSC84_RS01585	1.2411	1.1806	hydroxymethylpyrimidine/phosphomethylpyrimidine kinase
SSUSC84_RS01750	-1.1607	-1.2413	universal stress protein
SSUSC84_RS01810	-1.0461	-1.0621	UDP-glucose--hexose-1-phosphate uridylyltransferase
SSUSC84_RS02125	-1.3345	-1.2206	ribosomal subunit interface protein
SSUSC84_RS02230	-1.2613	-1.9487	PTS system mannose/fructose/N-acetylgalactosamine-transporter subunit IIB
SSUSC84_RS02235	-1.5325	-2.6079	PTS mannose/fructose/sorbose/N-acetylgalactosamine transporter subunit IIC
SSUSC84_RS02240	-1.7297	-2.7074	PTS fructose transporter subunit IID
SSUSC84_RS02255	1.2421	2.0011	DUF1912 domain-containing protein
SSUSC84_RS02440	1.0928	1.9331	amino acid ABC transporter ATP-binding protein
SSUSC84_RS02490	1.1996	1.7428	collagenase-like protease
SSUSC84_RS02495	1.2834	1.8441	hypothetical protein
SSUSC84_RS02505	-1.2717	-2.3919	hypothetical protein
SSUSC84_RS02650	-1.198	-2.3942	hypothetical protein
SSUSC84_RS02655	-1.2394	-2.1483	ABC transporter ATP-binding protein
SSUSC84_RS02660	-1.1308	-1.7747	GntR family transcriptional regulator
SSUSC84_RS02710	1.0107	1.6001	amino acid ABC transporter ATP-binding protein
SSUSC84_RS02720	-1.0423	-3.2888	MBL fold metallo-hydrolase
SSUSC84_RS02885	-1.4203	-2.2006	IS66 family insertion sequence hypothetical protein
SSUSC84_RS03035	-2.1271	-1.91	N-acetyltransferase
SSUSC84_RS03040	-2.282	-3.557	ornithine carbamoyltransferase
SSUSC84_RS03045	-2.4801	-4.9302	carbamate kinase
SSUSC84_RS03050	-2.8977	-5.1901	YfcC family protein
SSUSC84_RS03090	1.2192	2.2989	hypothetical protein
SSUSC84_RS03185	-1.2545	-1.2497	CBS domain-containing protein
SSUSC84_RS03330	1.0684	1.295	phosphopantothenate--cysteine ligase
SSUSC84_RS03455	1.0757	1.6789	4-hydroxy-tetrahydrodipicolinate synthase
SSUSC84_RS03500	-1.1518	-1.3851	hypothetical protein
SSUSC84_RS03705	1.646	2.6012	threonine aldolase
SSUSC84_RS03745	1.5394	3.4817	GNAT family N-acetyltransferase
SSUSC84_RS03820	1.2278	3.5449	ABC transporter ATP-binding protein
SSUSC84_RS03825	1.1619	3.595	ABC transporter ATP-binding protein
SSUSC84_RS03895	-1.1245	-2.4164	endonuclease III
SSUSC84_RS03900	1.0971	3.6794	MATE family efflux transporter
SSUSC84_RS03920	1.1277	2.2544	histidinol-phosphate aminotransferase family protein
SSUSC84_RS04100	-1.1026	-1.5576	hypothetical protein
SSUSC84_RS04885	1.437	2.1254	N-acetyltransferase
SSUSC84_RS04910	1.2599	3.3985	amino acid ABC transporter permease
SSUSC84_RS04935	-1.101	-1.774	hypothetical protein
SSUSC84_RS04945	1.0271	1.0462	aldose 1-epimerase family protein
SSUSC84_RS04965	1.2506	1.6084	transcriptional antiterminator
SSUSC84_RS05100	-1.5045	-3.6193	redox-sensing transcriptional repressor Rex
SSUSC84_RS05380	-1.0229	-1.8592	DUF1304 domain-containing protein
SSUSC84_RS05445	-1.0164	-2.9016	hypothetical protein
SSUSC84_RS05500	1.0461	2.5714	2-dehydro-3-deoxy-phosphogluconate aldolase
SSUSC84_RS05555	1.0019	1.9617	ATP synthase subunit gamma
SSUSC84_RS05560	1.0959	1.8811	ATP synthase subunit alpha
SSUSC84_RS05565	1.1804	1.9685	ATP synthase subunit delta
SSUSC84_RS05570	1.4858	2.2029	ATP synthase subunit B
SSUSC84_RS05575	1.3959	2.0968	F0F1 ATP synthase subunit A
SSUSC84_RS05580	1.7602	2.429	F0F1 ATP synthase subunit C
SSUSC84_RS05645	-1.018	-1.5122	membrane protein
SSUSC84_RS05665	1.3013	2.7667	DUF1846 domain-containing protein
SSUSC84_RS05745	-1.1013	-2.2156	preprotein translocase subunit YajC
SSUSC84_RS05750	-1.1666	-1.6827	PTS N-acetylglucosamine transporter subunit IIBC
SSUSC84_RS05755	-1.0086	-1.5627	PTS mannose/fructose/sorbose/N-acetylgalactosamine transporter subunit IIC
SSUSC84_RS05925	1.0658	3.0207	ABC transporter permease
SSUSC84_RS05930	1.0633	3.1501	lipoprotein
SSUSC84_RS05935	1.3547	3.5864	lipoprotein
SSUSC84_RS05990	1.0302	2.9021	50S ribosomal protein L20
SSUSC84_RS05995	1.1855	2.9338	50S ribosomal protein L35
SSUSC84_RS06000	1.1599	3.0598	translation initiation factor IF-3
SSUSC84_RS06145	1.3309	1.3238	Nif3-like dinuclear metal center hexameric protein
SSUSC84_RS06330	-1.0183	-1.2555	LacI family transcriptional regulator
SSUSC84_RS06470	1.5967	3.1278	surface-anchored protein
SSUSC84_RS06475	-1.1011	-1.0701	catabolite control protein A
SSUSC84_RS06485	1.2297	1.8766	tRNA guanosine(34) transglycosylase Tgt
SSUSC84_RS06545	1.3777	2.1915	tellurite resistance methyltransferase TehB
SSUSC84_RS06680	1.2284	1.6474	VanZ family protein
SSUSC84_RS07065	-1.0488	-1.3776	hypothetical protein
SSUSC84_RS07085	1.426	2.2086	phosphoserine phosphatase SerB
SSUSC84_RS07245	-1.0316	-3.8284	superoxide dismutase
SSUSC84_RS07280	1.2106	1.7188	branched-chain amino acid ABC transporter permease
SSUSC84_RS07400	2.1178	3.9863	ATP-dependent helicase
SSUSC84_RS07425	1.5144	2.6553	membrane protein
SSUSC84_RS07430	1.4871	2.8661	phosphomethylpyrimidine kinase
SSUSC84_RS07605	1.1855	3.4636	queuosine transporter QueT
SSUSC84_RS07610	-1.1547	-2.8233	GtrA family protein
SSUSC84_RS07625	1.088	1.4698	N-acetyltransferase
SSUSC84_RS07660	-1.2628	-1.9119	bifunctional biotin--[acetyl-CoA-carboxylase] synthetase/biotin operon repressor
SSUSC84_RS07945	2.551	1.5559	ABC transporter permease
SSUSC84_RS07950	2.7731	1.7701	ABC transporter ATP-binding protein
SSUSC84_RS07960	-1.2342	-4.3593	CsbD family protein
SSUSC84_RS07965	-1.2598	-4.1241	low molecular weight phosphotyrosine protein phosphatase
SSUSC84_RS07970	-1.0558	-2.6024	membrane protein
SSUSC84_RS07975	-1.1315	-2.4487	acyltransferase
SSUSC84_RS08325	1.1144	2.4117	methionine ABC transporter ATP-binding protein
SSUSC84_RS08360	1.3273	1.7925	Cof-type HAD-IIB family hydrolase
SSUSC84_RS08600	1.1554	3.0697	single-stranded DNA-binding protein
SSUSC84_RS08605	1.1069	3.1324	30S ribosomal protein S6
SSUSC84_RS08835	-1.0109	-2.4988	SPFH domain-containing protein
SSUSC84_RS09085	1.0482	2.0954	hypothetical protein
SSUSC84_RS09140	1.2291	2.8637	2-isopropylmalate synthase
SSUSC84_RS09185	-1.6971	-1.1908	dihydroxyacetone kinase subunit L
SSUSC84_RS09190	-1.6739	-1.6403	PTS-dependent dihydroxyacetone kinase phosphotransferase subunit DhaM
SSUSC84_RS09195	-1.7249	-2.1875	aquaporin family protein
SSUSC84_RS09290	1.0043	2.9574	30S ribosomal protein S2
SSUSC84_RS09305	1.504	4.6146	serine protease
SSUSC84_RS09400	1.1681	2.4321	sulfatase
SSUSC84_RS09535	1.1442	1.5051	LytTR family transcriptional regulator
SSUSC84_RS09700	1.2876	2.5066	amino acid ABC transporter ATP-binding protein
SSUSC84_RS09705	1.1205	2.2529	amino acid ABC transporter permease
SSUSC84_RS09720	-1.1517	-1.901	PTS sugar transporter subunit IIC
SSUSC84_RS09725	-1.1994	-1.4443	DUF3284 domain-containing protein
SSUSC84_RS09730	-2.6023	-1.6427	PTS lactose/cellobiose transporter subunit IIA
SSUSC84_RS09795	-1.0148	-1.7361	metal-dependent transcriptional regulator
SSUSC84_RS09990	-1.8333	-1.4804	choline-binding protein
SSUSC84_RS10010	-1.2468	-1.0892	sugar ABC transporter substrate-binding protein
SSUSC84_RS10105	1.3578	3.1849	thiol reductase thioredoxin
SSUSC84_RS10110	1.3501	2.8022	30S ribosomal protein S4
SSUSC84_RS10115	1.6446	2.861	hypothetical protein
SSUSC84_RS10370	-2.3615	-3.9046	IS110 family transposase
SSUSC84_RS10430	1.1152	2.3177	teichoic acid D-Ala incorporation-associated protein DltX
SSUSC84_RS10520	-1.0894	-2.0254	IS630 family transposase
SSUSC84_RS10565	-1.1119	-1.3254	maltodextrin phosphorylase
SSUSC84_RS10590	1.5957	2.9704	IS630 family transposase
SSUSC84_RS10595	-1.0838	-1.8061	IS630 family transposase
SSUSC84_RS10645	-1.2118	-1.7204	DUF871 domain-containing protein
SSUSC84_RS10675	-1.032	-1.7398	6S RNA
