# Supplementary material for: Transcriptomic Analysis of <em>Streptococcus suis</em> in Response to Ferrous Iron and Cobalt Toxicity
Source: Preprints.org preprint supplement (doi:10.20944/preprints202008.0708.v1), 2020-08-31
Supplement: Supplementary file 12 [file Table S6.docx]

**Table S6.** Primers used for reverse transcription PCR analysis.

| **Primer** | **Sequence (5’-3’)** | **Size (bp)** |
| --- | --- | --- |
| P1 | ACCCAGAAACTATCGGAGATG | 513 |
| P2 | TTTGCGAGCAATATCAATCTC |
| P3 | AACTCTCTGTCTCGCTACGTG | 519 |
| P4 | ATCATGAACTGAACCAAAAGC |
| P5 | CCATGCGAATCATCATTTTAC | 522 |
| P6 | TGGAAGACTAAGAAGACGGTG |
